1 **Distinct neural circuits establish the same chemosensory behavior in *C. elegans***

2

3 Navonil Banerjee<sup>1,2</sup>, Pei-Yin Shih<sup>3,4</sup>, Elisa J. Rojas Palato<sup>1</sup>, Paul W. Sternberg<sup>3</sup>, and Elissa A.  
4 Hallem<sup>1,2\*</sup>

5

6 <sup>1</sup>Department of Microbiology, Immunology, and Molecular Genetics, University of California, Los  
7 Angeles, CA 90095

8

9 <sup>2</sup>Molecular Biology Institute, University of California, Los Angeles, CA 90095

10

11 <sup>3</sup>Division of Biology and Biological Engineering, California Institute of Technology, Pasadena,  
12 CA 91125

13

14 <sup>4</sup>Present address: Department of Ecology, Evolution and Environmental Biology and Zuckerman  
15 Mind, Brain, Behavior Institute, Columbia University, New York, NY 10027

16

17 \*Corresponding author

18

19 Email: ehallem@ucla.edu

20 **Abstract**

21 Animals frequently exhibit the same behavior under different environmental or physiological  
22 conditions. To what extent these behaviors are generated by similar vs. distinct mechanisms is  
23 unclear. Moreover, the circumstances under which divergent neural mechanisms establish the  
24 same behavior, and the molecular signals that regulate the same behavior across conditions,  
25 are poorly understood. We show that in *C. elegans*, distinct neural mechanisms mediate the  
26 same chemosensory behavior at two different life stages. Both dauer larvae and starved adults  
27 are attracted to carbon dioxide (CO<sub>2</sub>), but CO<sub>2</sub> attraction is mediated by distinct sets of  
28 interneurons at the two life stages. Some interneurons mediate CO<sub>2</sub> response only in dauers,  
29 some show CO<sub>2</sub>-evoked activity in adults and dauers but contribute to CO<sub>2</sub> response only in  
30 adults, and some show CO<sub>2</sub>-evoked activity that opposes CO<sub>2</sub> attraction in adults but promotes  
31 CO<sub>2</sub> attraction in dauers. We also identify a novel role for insulin signaling in establishing life-  
32 stage-specific CO<sub>2</sub> responses by modulating interneuron activity. Further, we show that a  
33 combinatorial code of both shared and life-stage-specific molecular signals regulate CO<sub>2</sub>  
34 attraction. Our results identify a mechanism by which the same chemosensory behavior can be  
35 generated by distinct neural circuits, revealing an unexpected complexity to chemosensory  
36 processing.

37

38 **Introduction**

39 Many animals engage in the same behavior under widely varying environmental and  
40 physiological contexts. For example, juveniles and adults of the same species often engage in  
41 similar foraging or escape behaviors despite their vastly different physiological states (Pereira  
42 and Sokolowski 1993, Jackson and MacMillan 2000, Bradley et al. 2013, Stern et al. 2017).  
43 When an animal generates the same behavior under different circumstances, it is often  
44 assumed that the behavior is established by the same neural mechanisms regardless of  
45 context. Although electrophysiological studies have demonstrated that distinct circuit  
46 mechanisms can generate similar network outputs (Prinz et al. 2004, Bucher et al. 2005,  
47 Saideman et al. 2007, Goillard et al. 2009, Rodriguez et al. 2013, Hamood and Marder 2014,  
48 Marder et al. 2015, Cropper et al. 2016, Wang et al. 2019), the impact of such mechanisms on  
49 behavior is incompletely understood. Prior studies conducted in the free-living nematode  
50 *Caenorhabditis elegans* have shown that, in some instances, the same behaviors may arise  
51 from different neural mechanisms (Beverly et al. 2011, Trojanowski et al. 2014). In humans,  
52 children and adults were found to use different brain areas to perform the same word generation  
53 task (Brown et al. 2005), indicating that distinct neural pathways driving the same behavior may  
54 be widespread throughout the animal kingdom. The most common mechanism by which  
55 different circuits can give rise to the same behavior involves degeneracy, where multiple circuit  
56 components are capable of driving the same circuit output (Beverly et al. 2011, Trojanowski et  
57 al. 2014, Cropper et al. 2016). However, whether other mechanisms, such as the repurposing of  
58 circuit components, can be used to generate the same behavior across contexts remains  
59 unclear. In addition, the specific conditions under which such mechanisms are likely to be  
60 revealed are poorly understood, and the molecular mechanisms that enable distinct neural  
61 circuits to drive the same behavior across conditions have not been investigated.

62

63 To address this question, we used the behavioral responses of *C. elegans* to carbon dioxide  
64 (CO<sub>2</sub>) as a model system. *C. elegans* has a small nervous system with a well-characterized  
65 connectome (White et al. 1986, Varshney et al. 2011, Cook et al. 2019). In addition, *C. elegans*  
66 responds robustly to a diverse array of sensory cues, including CO<sub>2</sub> (Banerjee and Hallem  
67 2020). CO<sub>2</sub> is an ambiguous chemosensory cue for *C. elegans*, as elevated CO<sub>2</sub> levels in its  
68 natural habitat may signal food, predators, pathogens, or conspecifics (Carrillo and Hallem  
69 2015, Banerjee and Hallem 2020). Accordingly, *C. elegans* shows flexible responses to CO<sub>2</sub>  
70 such that CO<sub>2</sub> can be either attractive or repulsive depending on immediate context, prior  
71 experience, and life stage (Bretscher et al. 2008, Hallem and Sternberg 2008, Hallem et al.  
72 2011, Carrillo et al. 2013, Kodama-Namba et al. 2013, Guillermin et al. 2017, Rengarajan et al.  
73 2019). For example, well-fed *C. elegans* adults are repelled by CO<sub>2</sub>, while starved adults are  
74 attracted to CO<sub>2</sub>; this shift in CO<sub>2</sub> response valence occurs over the course of a few hours  
75 following food deprivation (Bretscher et al. 2008, Hallem and Sternberg 2008, Rengarajan et al.  
76 2019).

77  
78 Under adverse environmental conditions such as absence of food, high temperature, and  
79 overcrowding, *C. elegans* enters the developmentally arrested dauer larval stage (Golden and  
80 Riddle 1984, Hu 2007). Dauer entry is accompanied by a dramatic reprogramming of internal  
81 physiology that promotes developmental arrest and prolonged survival under unfavorable  
82 conditions (Fielenbach and Antebi 2008). Like starved adults, dauer larvae are robustly  
83 attracted to CO<sub>2</sub> (Hallem et al. 2011). In adults, both CO<sub>2</sub> attraction and CO<sub>2</sub> avoidance are  
84 mediated by the same neural circuit, and CO<sub>2</sub> response valence is determined by experience-  
85 dependent modulation of interneuron activity (Guillermin et al. 2017, Rengarajan et al. 2019).  
86 However, the neural circuit that mediates CO<sub>2</sub> attraction in dauers had not been investigated.

87  
88 Here, we show that dauers and starved adults use distinct neural circuits to generate attractive  
89 behavioral responses to CO<sub>2</sub>. While both dauers and adults require the CO<sub>2</sub>-detecting BAG  
90 sensory neurons for CO<sub>2</sub> attraction, they require distinct sets of downstream interneurons.  
91 These interneurons show life-stage-specific differences in their functional properties as well as  
92 life-stage-specific roles in regulating CO<sub>2</sub>-evoked behavior. In particular, the AIB and AVE  
93 interneurons exhibit dauer-specific CO<sub>2</sub>-evoked activity and promote CO<sub>2</sub> attraction selectively  
94 in dauers. In contrast, the CO<sub>2</sub>-evoked activity of the RIG interneurons opposes CO<sub>2</sub> attraction  
95 in adults but promotes CO<sub>2</sub> attraction in dauers, while the AIY interneurons show CO<sub>2</sub>-evoked  
96 activity in both dauers and adults but are required for behavior specifically in adults. Differences  
97 in the functional composition of the CO<sub>2</sub> circuit in dauers vs. adults arise in part from the  
98 formation of a dauer-specific electrical synapse (Bhattacharya et al. 2019). In addition, we  
99 elucidate a novel role for insulin signaling, mediated by the insulin receptor homolog DAF-2, in  
100 establishing life-stage-specific behavioral responses to CO<sub>2</sub> by modulating the CO<sub>2</sub>-evoked  
101 activities of distinct interneurons. Finally, we identify both shared and life-stage-specific  
102 neurotransmitters and neuropeptides that regulate CO<sub>2</sub> response at the two life stages.  
103 Together, our results illustrate that divergent regulatory mechanisms can establish the same  
104 chemosensory behavior through life-stage-specific changes in neural circuit function.

105  
106

## 107 **Results**

### 108 **Distinct sets of interneurons regulate CO<sub>2</sub> response in adults vs. dauers**

109 Well-fed *C. elegans* adults are repelled by CO<sub>2</sub>, whereas both starved adults and dauer larvae  
110 are attracted to CO<sub>2</sub> (Hallem et al. 2011, Guillermin et al. 2017, Rengarajan et al. 2019) (Fig.  
111 S1, Fig. 1a). To elucidate the CO<sub>2</sub> microcircuit of dauers, we first examined the neural activity of  
112 the CO<sub>2</sub>-detecting BAG neurons, which are required for CO<sub>2</sub> chemotaxis in both adults and  
113 dauers (Hallem and Sternberg 2008, Hallem et al. 2011, Smith et al. 2013). We found that  
114 similar to the BAG neurons of starved adults, the BAG neurons of dauers show excitatory  
115 calcium responses to CO<sub>2</sub> (Fig. S2). However, the BAG neurons of dauers showed a slightly  
116 reduced response to CO<sub>2</sub> relative to the BAG neurons of starved adults, which could result from  
117 reduced diffusion of CO<sub>2</sub> through the thicker cuticle of dauers or reduced sensitivity of the BAG  
118 neurons of dauers to CO<sub>2</sub> (Fig. S2). Nevertheless, both starved adults and dauers show  
119 depolarizing CO<sub>2</sub>-evoked activity in the CO<sub>2</sub>-detecting sensory neurons.

120  
121 We then investigated the CO<sub>2</sub> microcircuit that operates downstream of BAG to mediate CO<sub>2</sub>  
122 attraction in dauers. Although BAG neuron connectivity in dauers has not yet been  
123 characterized, in adults the BAG neurons are known to form chemical synapses with a number  
124 of interneurons, including the AIY, RIG, RIA, AIB, and AVE interneurons (Guillermin et al. 2017,  
125 Rengarajan et al. 2019). CO<sub>2</sub> repulsion in well-fed adults is mediated by the AIY, RIA, and RIG  
126 interneurons (Guillermin et al. 2017). Starvation modulates the CO<sub>2</sub>-evoked activity of AIY and  
127 suppresses the CO<sub>2</sub>-evoked activity of RIG, leading to CO<sub>2</sub> attraction (Rengarajan et al. 2019).  
128 To identify the interneurons required for CO<sub>2</sub> attraction in dauers, we tested behavioral  
129 responses to CO<sub>2</sub> in strains where individual interneurons were either genetically ablated or  
130 silenced with tetanus toxin (Guillermin et al. 2017, Katz et al. 2018). Surprisingly, we found that  
131 whereas AIY mediates CO<sub>2</sub> response in both well-fed and starved adults (Guillermin et al. 2017,  
132 Rengarajan et al. 2019), it is not required for CO<sub>2</sub> response in dauers: dauers lacking AIY exhibit  
133 normal CO<sub>2</sub> attraction (Fig. 1b, Fig. S3). The RIA interneurons are also not required for CO<sub>2</sub>  
134 attraction in dauers (Fig. 1b, Fig. S3). Instead, the RIG, AIB, and AVE interneurons mediate CO<sub>2</sub>  
135 attraction in dauers. Dauers lacking RIG or AIB function showed significantly reduced CO<sub>2</sub>  
136 attraction, whereas dauers lacking AVE function were repelled by instead of attracted to CO<sub>2</sub>  
137 (Fig. 1b-d, Fig. S3-4). Importantly, starved adults lacking RIG function showed normal  
138 responses to CO<sub>2</sub> (Rengarajan et al. 2019), and both well-fed and starved adults lacking either  
139 AIB or AVE function showed normal responses to CO<sub>2</sub> (Fig. 1c-d, Fig. S4). Thus, RIG, AIB, and  
140 AVE mediate CO<sub>2</sub> attraction specifically in dauers.

141  
142 The only tested interneuron that was required for CO<sub>2</sub> response in both dauers and adults was  
143 RIG. Although RIG is not required for CO<sub>2</sub> attraction in starved adults, well-fed adults lacking  
144 RIG showed reduced CO<sub>2</sub> repulsion (Guillermin et al. 2017, Rengarajan et al. 2019) and dauers  
145 lacking RIG showed reduced CO<sub>2</sub> attraction (Fig. 1b, Fig. S3). Moreover, increasing  
146 neurotransmission and neuropeptide release from RIG by expressing a gain-of-function allele of  
147 the protein kinase C (*pkc-1*) gene (Sieburth et al. 2005, Sieburth et al. 2007) specifically in RIG  
148 resulted in enhanced CO<sub>2</sub> repulsion in well-fed adults (Guillermin et al. 2017) and enhanced  
149 CO<sub>2</sub> attraction in dauers (Fig. S5a). Thus, RIG regulates CO<sub>2</sub> repulsion in well-fed adults and

150 CO<sub>2</sub> attraction in dauers. Our results demonstrate that the same interneuron can play distinct  
151 roles at different life stages.

152

### 153 **Similar interneuron activity promotes opposite behaviors in well-fed adults vs. dauers**

154 To gain insight into the functional properties of the interneurons that promote CO<sub>2</sub> attraction in  
155 dauers, we investigated their CO<sub>2</sub>-evoked calcium responses. We first examined the responses  
156 of the RIG interneurons. RIG displays excitatory CO<sub>2</sub>-evoked activity in well-fed adults, but this  
157 activity is silenced during starvation (Guillermin et al. 2017, Rengarajan et al. 2019). Consistent  
158 with previous findings, we observed excitatory activity in RIG in well-fed adults (Fig. 2a).  
159 Strikingly, RIG displayed similar excitatory CO<sub>2</sub>-evoked activity in dauers, despite the fact that  
160 well-fed adults and dauers show opposite CO<sub>2</sub>-evoked behaviors (Fig. 2a-b). As in adults  
161 (Guillermin et al. 2017), these excitatory responses in RIG were eliminated in dauers where the  
162 primary CO<sub>2</sub>-sensing BAG neurons were genetically ablated (Fig. S5b-c), indicating that RIG  
163 activity in dauers is dependent on sensory input from BAG. Together, these results suggest that  
164 the role of RIG in establishing CO<sub>2</sub> response valence differs across life stages, such that  
165 excitatory activity from RIG promotes CO<sub>2</sub> repulsion in well-fed adults and CO<sub>2</sub> attraction in  
166 dauers.

167

168 We next examined the CO<sub>2</sub>-evoked calcium responses of the AIY interneurons, which are  
169 required for CO<sub>2</sub> attraction in starved adults (Rengarajan et al. 2019) but not dauers (Fig. 1b,  
170 Fig. S3a). The AIY interneurons in well-fed adults are inhibited by CO<sub>2</sub>, and AIY ablation leads  
171 to enhanced CO<sub>2</sub> avoidance (Guillermin et al. 2017). In contrast, the AIY interneurons of starved  
172 adults show stochastic responses to CO<sub>2</sub> such that roughly equal proportions of animals display  
173 excitatory and inhibitory activity in AIY, and AIY-ablated starved adults show reduced CO<sub>2</sub>  
174 attraction (Rengarajan et al. 2019). Thus, inhibition of AIY is associated with CO<sub>2</sub> repulsion in  
175 well-fed adults and activation of AIY is associated with CO<sub>2</sub> attraction in starved adults  
176 (Guillermin et al. 2017, Rengarajan et al. 2019). We found that the AIY interneurons of dauers  
177 show inhibitory calcium responses to CO<sub>2</sub> that are indistinguishable from those of well-fed adults  
178 (Fig. 2c-d), despite the fact that well-fed adults and dauers exhibit opposite CO<sub>2</sub>-evoked  
179 behaviors. Thus, whereas starvation modulates AIY activity in adults to promote the shift from  
180 CO<sub>2</sub> repulsion to CO<sub>2</sub> attraction, AIY activity in dauers is the same as in well-fed adults.  
181 However, AIY appears to uncouple from the CO<sub>2</sub> microcircuit in dauers such that it still responds  
182 to CO<sub>2</sub> but no longer regulates CO<sub>2</sub>-evoked behavior. Together, these results illustrate that  
183 interneurons with similar activity patterns at different life stages may not play similar roles in  
184 regulating behavior.

185

### 186 **The AIB interneurons show CO<sub>2</sub>-evoked calcium responses specifically in dauers**

187 In contrast to RIG and AIY, the AIB interneurons promote CO<sub>2</sub> attraction selectively in dauers  
188 (Fig. 1b-c, Fig. S4). To gain a deeper understanding of how AIB regulates dauer-specific CO<sub>2</sub>  
189 responses, we monitored its CO<sub>2</sub>-evoked calcium activity in adults and dauers. We found that  
190 AIB is mostly unresponsive to CO<sub>2</sub> in well-fed and starved adults (Fig. 3a-b). In contrast, the AIB  
191 interneurons of dauers show robust excitatory calcium responses to CO<sub>2</sub> (Fig. 3a-b). Thus, AIB  
192 is selectively activated by CO<sub>2</sub> in dauers but not adults. AIB is known to play a role in regulating  
193 basal locomotion as well as navigation in response to multiple chemosensory cues (Gray et al.



194 2005, Chalasani et al. 2007, Piggott et al. 2011, Gordus et al. 2015, Summers et al. 2015). To  
195 confirm that the excitatory activity displayed by AIB in dauers was evoked by CO<sub>2</sub>, we measured  
196 AIB activity in response to an air control where the CO<sub>2</sub> pulse was replaced with an air pulse  
197 (21% O<sub>2</sub>, balance N<sub>2</sub>) of equivalent duration. While the AIB responses of well-fed adults and  
198 starved adults were indistinguishable between CO<sub>2</sub> and air controls, the CO<sub>2</sub>-evoked AIB  
199 responses in dauers were significantly higher than their respective air controls (Fig. S6a),  
200 suggesting that the excitatory calcium responses of AIB in dauers are evoked by CO<sub>2</sub> and not  
201 due to the slight movements of animals during imaging.

202  
203 To test whether AIB excitatory activity is required post-developmentally to establish dauer-  
204 specific CO<sub>2</sub> attraction, we examined the behavioral responses of transgenic dauers with AIB-  
205 specific expression of the histamine-gated chloride channel HisCl1 (Pokala et al. 2014). We  
206 found that transient and inducible silencing of AIB by HisCl1 resulted in significantly reduced  
207 CO<sub>2</sub> attraction in dauers (Fig. S6b), suggesting a non-developmental role for AIB in promoting  
208 CO<sub>2</sub> attraction in dauers.

209  
210 We then investigated the circuit-level changes that allow AIB to exhibit CO<sub>2</sub>-evoked activity  
211 specifically in dauers. The AIB interneurons form gap junctions with the BAG neurons  
212 specifically in dauers (Bhattacharya et al. 2019). Expression of the innexin gene *inx-6*  
213 specifically in AIB in dauers results in the formation of a heteromeric gap junction complex  
214 consisting of INX-6 and another gap junction subunit, CHE-7, which is expressed in BAG as well  
215 as other neurons across life stages (Bhattacharya et al. 2019) (Fig. 3c). This gap junction  
216 complex is localized at the contact points between the processes of BAG and AIB (Bhattacharya  
217 et al. 2019). To test whether the excitatory CO<sub>2</sub>-evoked calcium responses in AIB in dauers  
218 arise due to the dauer-specific INX-6/CHE-7 gap junction complex, we monitored CO<sub>2</sub>-evoked  
219 calcium activity in the AIB interneurons of *che-7* loss-of-function (*lf*) mutant dauers. We found  
220 that the strong excitatory calcium responses were almost entirely absent in *che-7(lf)* dauers  
221 (Fig. 3d-e). Moreover, in *che-7(lf)* dauers, the calcium activity of AIB in response to CO<sub>2</sub> was  
222 indistinguishable from that in response to the air control (Fig. S7a). These results suggest that  
223 the CO<sub>2</sub>-evoked calcium responses of AIB in dauers are dependent on the dauer-specific BAG-  
224 AIB electrical synapse. In CO<sub>2</sub> chemotaxis assays, *che-7(lf)* mutant dauers, as well as dauers  
225 where *inx-6(lf)* expression is eliminated specifically in AIB (*inx-6<sup>AIB OFF</sup>*), showed significantly  
226 reduced CO<sub>2</sub> attraction compared to wild-type dauers (Fig. 3f), consistent with previous results  
227 (Bhattacharya et al. 2019). Moreover, the defects in CO<sub>2</sub> attraction of *che-7(lf)* and *inx-6<sup>AIB OFF</sup>*  
228 dauers were comparable to those of dauers with genetically ablated AIB neurons (Fig. 3f).  
229 Ectopic expression of *inx-6* in AIB at the adult stage (Bhattacharya et al. 2019) did not affect  
230 CO<sub>2</sub> responses in well-fed adults (consistent with a previous report (Bhattacharya et al. 2019))  
231 or starved adults (Fig. S7b-c), indicating that additional mechanisms contribute to the dauer-  
232 specific role of AIB in regulating CO<sub>2</sub> response. Together, these results suggest that changes in  
233 electrical synaptic wiring between the CO<sub>2</sub>-detecting BAG neurons and the AIB interneurons in  
234 dauers contribute to the ability of dauers to utilize a distinct CO<sub>2</sub> microcircuit compared to adults.

235  
236 **Inhibitory activity in a command interneuron is associated with CO<sub>2</sub> attraction**  
237 **specifically in dauers**

238 The AVE interneurons promote CO<sub>2</sub> attraction in dauers but do not significantly alter CO<sub>2</sub>  
239 responses in adults (Fig. 1b, d). To gain insight into the role of AVE in shaping CO<sub>2</sub> responses  
240 specifically in dauers, we monitored CO<sub>2</sub>-evoked calcium responses in AVE in both adults and  
241 dauers. AVE activity is known to be associated with reversals in adults (Piggott et al. 2011), but  
242 its role in regulating chemosensory behaviors remains poorly understood. We found that AVE is  
243 mostly unresponsive to CO<sub>2</sub> in well-fed adults and starved adults (Fig. 4a), consistent with our  
244 behavioral results (Fig. 1d). In contrast, AVE is predominantly inhibited by CO<sub>2</sub> in dauers (Fig.  
245 4a). The minimum peak amplitudes of the CO<sub>2</sub>-evoked calcium responses were significantly  
246 lower in dauers relative to adults (Fig. 4b), while the maximum peak amplitudes were similar  
247 (Fig. 4c). Thus, the AVE interneurons are specifically inhibited by CO<sub>2</sub> in dauers.

248  
249 To further characterize the differences in AVE activity between adults and dauers, we examined  
250 the categorical distribution of responses at the two different life stages. Responses were  
251 categorized as either excitatory or inhibitory if the absolute value of the response exceeded  
252 three standard deviations of the response to an air control (Rengarajan et al. 2019). We found  
253 that the AVE interneurons of well-fed adults were unresponsive to CO<sub>2</sub> in all animals tested (Fig.  
254 4d). Starved adults showed excitatory AVE responses in ~39% of animals tested; the AVE  
255 neurons of the remaining animals were unresponsive to CO<sub>2</sub> (Fig. 4d). However, the AVE  
256 responses we observed in starved adults exposed to CO<sub>2</sub> were not significantly different from  
257 the AVE responses of starved adults exposed to an air control, indicating that these responses  
258 were not specifically evoked by CO<sub>2</sub> (Fig. S8a-b). In contrast, dauers showed inhibitory  
259 responses in AVE in roughly 45% of animals, a pattern that we did not observe in adults (Fig.  
260 4d). In addition, the inhibitory AVE responses we observed in dauers were significantly different  
261 between CO<sub>2</sub> and air controls (Fig. S8b), indicating that these responses were evoked by CO<sub>2</sub>.  
262 Although a smaller percentage (20%) of dauers showed excitatory activity in AVE, the excitatory  
263 responses of AVE to CO<sub>2</sub> were not significantly different from those observed in response to the  
264 air control (Fig. S8a), indicating that they were not CO<sub>2</sub>-evoked. Moreover, the excitatory AVE  
265 responses of dauers did not differ significantly from those of well-fed or starved adults (Fig. 4d).  
266 Together, our results indicate that AVE command interneurons show CO<sub>2</sub>-evoked inhibitory  
267 activity specifically in dauers.

### 268 269 **Insulin signaling establishes life-stage-specific CO<sub>2</sub> responses by modulating the** 270 **activities of distinct interneurons in dauers vs. adults**

271 We next investigated the molecular mechanisms that shape CO<sub>2</sub> response across life stages.  
272 We first examined the role of insulin signaling in regulating CO<sub>2</sub> response in dauers and adults,  
273 since the insulin pathway plays an important role in regulating the developmental decision to  
274 enter the dauer state (Hu 2007). Insulin signaling also regulates a number of chemosensory  
275 behaviors in adults, including salt chemotaxis (Tomioka et al. 2006, Adachi et al. 2010) and  
276 acute CO<sub>2</sub> avoidance (Hallem and Sternberg 2008). However, its role in regulating  
277 chemosensory responses in dauers had not been examined. We first examined the CO<sub>2</sub>  
278 response of animals carrying a loss-of-function mutation in the *daf-2* gene, which encodes the  
279 sole *C. elegans* homolog of the mammalian insulin/IGF receptor (Hu 2007). We found that both  
280 well-fed and starved *daf-2(lf)* mutant adults were strongly attracted to CO<sub>2</sub> (Fig. 5a), reflecting a  
281 switch in CO<sub>2</sub> response valence in well-fed adults. In contrast, *daf-2(lf)* mutant dauers were

282 unresponsive to CO<sub>2</sub> (Fig. 5a). In addition, we found that dauers carrying loss-of-function  
283 mutations in the 3-phosphoinositide-dependent-kinase-1 gene *pdk-1* and the protein kinase B  
284 (Akt/PKB) gene *akt-1*, both of which act downstream of *daf-2* in the *C. elegans* insulin pathway  
285 (Hu 2007), showed significantly reduced CO<sub>2</sub> attraction (Fig. S9a). Thus, insulin signaling plays  
286 a life-stage-specific role in modulating CO<sub>2</sub> response: it promotes CO<sub>2</sub> repulsion in well-fed  
287 adults and CO<sub>2</sub> attraction in dauers.

288  
289 We next sought to identify the DAF-2 ligands that modulate CO<sub>2</sub> response. The *C. elegans*  
290 genome encodes 40 insulin-like peptides (ILPs) (Li and Kim 2008). To identify ILPs that may be  
291 involved in establishing CO<sub>2</sub> attraction in dauers, we examined a subset of ILP genes known to  
292 be transcriptionally upregulated upon dauer entry (Lee et al. 2017). We found that dauers  
293 carrying loss-of-function mutations in the *ins-1* gene showed significantly reduced CO<sub>2</sub> attraction  
294 compared to wild-type dauers (Fig. 5b, Fig. S9b). In contrast, CO<sub>2</sub> repulsion in well-fed adults  
295 and CO<sub>2</sub> attraction in starved adults were unaffected in *ins-1(lf)* mutants (Fig. 5b). These results  
296 strongly suggest that the modulatory actions of INS-1 are specific to dauers, although we cannot  
297 exclude the possibility that INS-1 may act redundantly with other peptides to regulate CO<sub>2</sub>  
298 response in adults.

299  
300 To better understand how insulin signaling establishes life-stage-specific CO<sub>2</sub> responses, we  
301 examined the effects of DAF-2 on neural activity within the CO<sub>2</sub> microcircuit. We first examined  
302 CO<sub>2</sub>-evoked calcium responses of RIG in *daf-2(lf)* mutants, since RIG excitatory activity was  
303 associated with opposite behavioral responses to CO<sub>2</sub> in well-fed adults vs. dauers (Fig. 2a-b).  
304 We found that RIG showed similar excitatory calcium responses in *daf-2(lf)* mutant dauers  
305 compared to wild-type dauers (Fig. 5c-d). In contrast, RIG was largely silent in *daf-2(lf)* mutant  
306 well-fed adults (Fig. 5c-d). These results suggest that DAF-2 modulates RIG activity specifically  
307 in well-fed adults. We previously showed that activation of RIG promotes CO<sub>2</sub> repulsion in well-  
308 fed adults, and silencing RIG accelerates the shift from CO<sub>2</sub> repulsion to CO<sub>2</sub> attraction during  
309 starvation (Guillermin et al. 2017, Rengarajan et al. 2019). Thus, the CO<sub>2</sub> attraction observed in  
310 *daf-2(lf)* well-fed adults likely arises in part from the loss of CO<sub>2</sub>-evoked activity in RIG.

311  
312 We next examined CO<sub>2</sub>-evoked calcium responses in AIB, since AIB promotes CO<sub>2</sub> attraction  
313 specifically in dauers (Fig. S4). We found that the excitatory CO<sub>2</sub>-evoked calcium responses in  
314 AIB seen in wild-type dauers were largely eliminated in *daf-2(lf)* dauers (Fig. 5e-f). These results  
315 suggest that the dauer-specific calcium responses of AIB are dependent on insulin signaling. In  
316 contrast, the AIB responses of *daf-2(lf)* well-fed adults were indistinguishable from those of wild-  
317 type adults; neither displayed CO<sub>2</sub>-evoked activity (Fig. 5e-f). Thus, the loss of CO<sub>2</sub> attraction in  
318 *daf-2(lf)* dauers likely arises in part from the silencing of AIB activity. Together, our results  
319 suggest that insulin signaling establishes life-stage-specific CO<sub>2</sub> responses by fine-tuning the  
320 activities of distinct interneurons within the CO<sub>2</sub> microcircuit.

### 321 322 **Both shared and distinct molecular signals establish CO<sub>2</sub> response in adults vs. dauers**

323 We next investigated additional signaling mechanisms that may establish CO<sub>2</sub> response in  
324 adults vs. dauers. The CO<sub>2</sub>-detecting BAG neurons express the vesicular glutamate transporter  
325 EAT-4 (Serrano-Saiz et al. 2013), and well-fed adults carrying a loss-of-function mutation in the



326 *eat-4* gene show dramatically reduced CO<sub>2</sub> repulsion (Guillermin et al. 2017). We found that *eat-*  
327 *4(lf)* dauers showed normal responses to CO<sub>2</sub>, while starved *eat-4(lf)* adults showed significantly  
328 reduced CO<sub>2</sub> attraction (Fig. 6a). Thus, glutamate signaling is required for CO<sub>2</sub> response in  
329 adults but not dauers. We next investigated the CO<sub>2</sub> response of dauers carrying a loss-of-  
330 function mutation in the tyrosine decarboxylase gene *tdc-1*, which regulates tyraminerbic and  
331 octopaminergic signaling (Chase and Koelle 2007), since TDC-1 promotes CO<sub>2</sub> attraction during  
332 starvation in adults (Rengarajan et al. 2019). We found that, similar to CO<sub>2</sub> attraction in starved  
333 adults, CO<sub>2</sub> attraction in dauers was significantly reduced in *tdc-1(lf)* mutants (Fig. 6b). These  
334 results suggest that both dauers and starved adults utilize biogenic amine signaling to promote  
335 CO<sub>2</sub> attraction.

336  
337 Neuropeptide signaling plays a critical role in modulating neural circuit function and behavior  
338 across species (Li and Kim 2008), and was previously shown to modulate the CO<sub>2</sub>-evoked  
339 behavioral responses of *C. elegans* adults (Guillermin et al. 2017). To examine whether CO<sub>2</sub>  
340 responses in dauers are regulated by neuropeptides, we performed a candidate screen of  
341 dauers carrying loss-of-function mutations in 16 neuropeptide genes (Fig. S10a). We focused  
342 on neuropeptide genes that are either expressed in BAG neurons (Hallem et al. 2011);  
343 transcriptionally upregulated upon dauer entry (Lee et al. 2017); known to play a role in  
344 regulating CO<sub>2</sub> response in adults (Guillermin et al. 2017, Rengarajan et al. 2019); or that  
345 encode neuropeptides dependent on the neuropeptide-processing gene *sbt-1*, since *sbt-1*  
346 promotes dauer entry and regulates CO<sub>2</sub> attraction in dauers (Lee et al. 2017). We found that  
347 dauers carrying loss-of-function mutations in the BAG-expressed FMRFamide-like neuropeptide  
348 gene *flp-17* showed significantly reduced CO<sub>2</sub> attraction compared to wild-type dauers (Fig.  
349 S10a, Fig. 6c). FLP-17 was previously shown to be required for CO<sub>2</sub> repulsion in well-fed adults  
350 (Guillermin et al. 2017); we found that it is also required for normal CO<sub>2</sub> attraction in starved  
351 adults (Fig. 6c). Thus, FLP-17 promotes CO<sub>2</sub> response in both dauers and adults, regardless of  
352 CO<sub>2</sub> response valence.

353  
354 We also found that dauers with loss-of-function mutations in the FMRFamide-like neuropeptide  
355 gene *flp-2* showed significantly reduced CO<sub>2</sub> attraction (Fig. S10, Fig. 6d), while CO<sub>2</sub> repulsion  
356 in well-fed adults and CO<sub>2</sub> attraction in starved adults remained unaffected in *flp-2* mutants (Fig.  
357 S10b, Fig. 6d). Thus, FLP-2 neuropeptides play a novel role in regulating CO<sub>2</sub> attraction  
358 specifically in dauers. In contrast, we found that *nlp-1* and *flp-16*, which were previously shown  
359 to regulate CO<sub>2</sub> attraction in starved adults (Rengarajan et al. 2019), did not regulate CO<sub>2</sub>  
360 attraction in dauers (Fig. S10a). Thus, NLP-1 and FLP-16 play adult-specific roles in regulating  
361 CO<sub>2</sub> response. Together, our results demonstrate that both shared and life-stage-specific  
362 molecular pathways drive CO<sub>2</sub>-evoked behaviors across life stages. Moreover, the similar  
363 behavioral responses of dauers and starved adults are shaped by both shared and distinct  
364 molecular mechanisms.

## 365 366 **Discussion**

367 We have shown that dauers and starved adults achieve the same behavioral state, CO<sub>2</sub>  
368 attraction, using distinct neural circuits. While the same CO<sub>2</sub>-detecting sensory neurons are  
369 required for CO<sub>2</sub> response in dauers and adults, distinct sets of interneurons mediate these

370 responses (Fig. 7). Some interneurons are required for CO<sub>2</sub> response in adults but not dauers,  
371 some are required in dauers but not adults, and some promote opposite responses to CO<sub>2</sub> at  
372 the two life stages (Fig. 7). Thus, the same behavior can arise from distinct patterns of  
373 interneuron activity.

374  
375 Previous studies in *C. elegans* have shown that the same thermotaxis behavior can result from  
376 the activities of different combinations of thermosensory neurons in different environmental  
377 contexts as a result of sensory neuron degeneracy (Beverly et al. 2011, Yeon et al. 2021). In  
378 contrast to this scenario, the same pair of sensory neurons is required for CO<sub>2</sub> response across  
379 contexts and life stages (Hallem et al. 2011, Guillermin et al. 2017, Rengarajan et al. 2019).  
380 Differences in the CO<sub>2</sub> circuit composition of dauers vs. adults arise instead at the level of  
381 interneurons and do not reflect circuit degeneracy (Fig. 7). Although it is unclear why dauers  
382 utilize a distinct set of interneurons from adults to mediate CO<sub>2</sub> response, one possibility is that  
383 the dauer circuit reflects the need for dauers to coordinate CO<sub>2</sub> attraction with other dauer-  
384 specific behaviors, such as nictation and dauer recovery (Hu 2007). It remains to be determined  
385 if CO<sub>2</sub> acts as a sensory cue to drive these or other dauer-specific behaviors.

386  
387 While most interneurons in the CO<sub>2</sub> microcircuit are required for CO<sub>2</sub> response exclusively in  
388 adults or dauers, the RIG interneurons are required for CO<sub>2</sub> response at both life stages  
389 (Guillermin et al. 2017, Rengarajan et al. 2019) (Fig. 1b). Surprisingly, however, excitatory CO<sub>2</sub>-  
390 evoked activity in RIG is associated with opposite behavioral responses in well-fed adults vs.  
391 dauers: the depolarizing activity of RIG promotes CO<sub>2</sub> repulsion in adults and CO<sub>2</sub> attraction in  
392 dauers (Fig. 2a-b). Thus, the “meaning” of RIG activity varies across life stages. While the  
393 connectomes of adults and non-dauer larvae are known (White et al. 1986, Witvliet et al. 2020),  
394 the connectome of dauer larvae has not yet been mapped. Thus, whether the meaning of RIG  
395 activity changes as a result of dauer-specific structural changes in neural connectivity or  
396 functional changes in signaling remains to be determined.

397  
398 The AIB interneurons contribute to CO<sub>2</sub> attraction specifically in dauers at least in part as a  
399 result of dauer-specific gap junctions between BAG and AIB (Bhattacharya et al. 2019) (Fig. 3).  
400 CO<sub>2</sub>-evoked activity occurs in AIB specifically in dauers and requires the CHE-7/INX-6 gap  
401 junction complex (Fig. 3, Fig. S6b). The BAG neurons form a chemical synapse with AIB in  
402 adults (White et al. 1986, Witvliet et al. 2020), but the presence of this synapse does not appear  
403 to be sufficient for CO<sub>2</sub>-evoked activity in the AIB neurons (Fig. 3a-b). It is possible that the  
404 electrical synapses between BAG and AIB in dauers lead to alterations in the composition  
405 and/or function of the chemical synapses between BAG and AIB, as has been shown for a  
406 different synapse in *C. elegans* (Liu et al. 2017). We have also shown that dauer-specific AIB  
407 activity is dependent on insulin signaling (Fig. 5e-f). Thus, AIB activity in dauers is shaped by  
408 the combined actions of the insulin pathway and gap junction signaling.

409  
410 Together, our results demonstrate that CO<sub>2</sub> attraction in dauers vs. adults is established via  
411 distinct neural circuits and regulated by shared as well as distinct molecular pathways (Fig. 7).  
412 In future studies, it will be interesting to determine whether different neural and molecular  
413 mechanisms also underlie similar chemosensory behaviors in other organisms, including

414 humans. In addition, dauer larvae are developmentally similar to the infective larvae of parasitic  
415 nematodes (Crook 2014), which infect over one billion people worldwide and cause some of the  
416 most devastating neglected tropical diseases (Schafer and Skopic 2006, Lustigman et al. 2012).  
417 The infective larvae of multiple parasitic nematode species use CO<sub>2</sub> as a host-seeking cue  
418 (Hallem et al. 2011, Castelletto et al. 2014, Lee et al. 2016, Ruiz et al. 2017, Banerjee and  
419 Hallem 2020), but the neural mechanisms that drive these responses remain unknown. Thus, a  
420 better understanding of how *C. elegans* responds to CO<sub>2</sub> may lead to new strategies for  
421 controlling these devastating parasites.

422

## 423 **Methods**

### 424 ***C. elegans* strains**

425 Worms were cultured and maintained on 2% Nematode Growth Media (NGM) plates seeded  
426 with *Escherichia coli* OP50 bacteria at ambient temperature (~22°C) and CO<sub>2</sub> (~0.038%)  
427 following standard procedures (Stiernagle 2006, Scott 2011). The temperature-sensitive, dauer-  
428 constitutive strains CB1370, EAH382, EAH383 and JT191 were maintained at 15°C but were  
429 moved to ambient temperature (~22°C) at least 24 h prior to experiments to minimize any  
430 effects of temperature shifts on behavior or neural calcium responses. Notably, temperature  
431 shifts performed on the wild-type (N2) strain did not significantly alter behavioral responses in  
432 CO<sub>2</sub> chemotaxis assays ( $p > 0.6$ , Welch's t-test). Strains used in this study are listed in Extended  
433 Data Table 1. The strains EAH381 and EAH383 were generated by crossing EAH259 *Ex[odr-*  
434 *2(1b)::YC3.60; lin-44::GFP]* to RB1834 *che-7(ok2373)* and CB1370 *daf-2(e1370)*, respectively.  
435 The strain EAH382 was generated by crossing PS6028 *syEx1134[twk-3::YC3.60; pax-2::GFP]*  
436 to CB1370 *daf-2(e1370)*.

437

### 438 **Preparation of animals for CO<sub>2</sub> chemotaxis assays**

439 *Well-fed adults:* All experiments were performed with young adults (~1 day old) as previously  
440 described (Guillermin et al. 2017, Rengarajan et al. 2019). Briefly, animals were collected in a  
441 65 mm Syracuse watch glass by washing them off plates with M9 buffer. Animals were washed  
442 twice with M9 buffer and then once with ddH<sub>2</sub>O in the watch glass. Animals were then gently  
443 transferred onto a small rectangular piece of Whatman filter paper, which was used to transport  
444 them to the center of a 10 cm 2% NGM plate without food for chemotaxis assays.

445

446 *Starved adults:* Young adults were washed in a watch glass as described above, and then  
447 starved on a 10 cm 2% NGM plate without bacterial food for 3 h as previously described  
448 (Rengarajan et al. 2019). Animals were placed within an annular ring of filter paper soaked in 20  
449 mM copper chloride (CuCl<sub>2</sub>) solution to keep them from crawling off the edges of plates, since  
450 copper is aversive to *C. elegans* (Campbell et al. 2017). After 3 h of starvation, the CuCl<sub>2</sub> ring  
451 was removed, and the animals were collected from the plate and washed twice in M9 and once  
452 in ddH<sub>2</sub>O in a watch glass. Animals were then transferred onto the center of a 10 cm 2% NGM  
453 plate for chemotaxis assays using a piece of Whatman filter paper.

454

455 *Dauers:* To generate dauer larvae, 8-10 young adults were transferred to 2% NGM plates with a  
456 lawn of OP50 and left for 10-14 days at room temperature until the OP50 on the plates was

457 depleted. Dauers were differentiated from other life stages on the basis of resistance to sodium  
458 dodecyl sulphate (SDS), as described previously (Karp 2016). Briefly, animals were washed off  
459 food-depleted plates with dH<sub>2</sub>O into a 15 mL conical tube and centrifuged at 1000 rpm for 60-90  
460 s. The supernatant was discarded without disturbing the worm pellet. The tube was then filled  
461 with 5 mL 1% SDS solution and gently mixed on a rotator at room temperature for 15 min.  
462 Following SDS treatment, the tube was centrifuged at 1000 rpm for 60-90 s, and the SDS was  
463 removed without disturbing the pellet. 10 mL dH<sub>2</sub>O was then added to the tube, which was  
464 mixed thoroughly and then centrifuged at 1000 rpm for 60-90 s. Washes with 10 mL dH<sub>2</sub>O were  
465 repeated twice for a total of three washes. Finally, dauers were transferred in water drops onto  
466 2% NGM plates for chemotaxis assays as indicated (Fig. S1).

467

### 468 **CO<sub>2</sub> chemotaxis assays**

469 CO<sub>2</sub> chemotaxis assays were performed as previously described (Guillermin et al. 2017,  
470 Rengarajan et al. 2019). Animals were placed onto the center of a 10 cm 2% NGM plate at the  
471 start of assay. The CO<sub>2</sub> stimulus (the desired concentration of CO<sub>2</sub>, 21% O<sub>2</sub>, balance N<sub>2</sub>) and air  
472 stimulus (21% O<sub>2</sub>, balance N<sub>2</sub>) were pumped through holes in opposite sides of the plate lid to  
473 establish a CO<sub>2</sub> gradient (Fig. S1a). Gas stimuli were delivered using a syringe pump (PHD  
474 2000, Harvard Apparatus) through ¼-inch flexible PVC tubing at flow rates of 2 mL/min (for  
475 adult assays) or 0.5 mL/min (for dauer assays). Assays ran for 20 min (for adults) or 1 h (for  
476 dauers). At the end of each assay, the number of animals within a 20 mm diameter circle under  
477 each gas inlet (in the case of adults) or within the indicated 30 mm segments on both sides of  
478 the plate (in the case of dauers) were counted (Fig. S1b-c). For transgenic strains containing  
479 extrachromosomal arrays, only the animals expressing fluorescent markers within the scoring  
480 regions were counted under a fluorescent dissecting microscope. A Chemotaxis Index (CI) was  
481 then calculated as:

$$482 \quad CI = \frac{\# \text{ animals in the CO}_2 \text{ region} - \# \text{ animals in the air control region}}{\# \text{ animals in the CO}_2 \text{ region} + \# \text{ animals in the air control region}}$$

483

484 To control for directional bias due to room vibration or other sources, assays were conducted in  
485 pairs, with the CO<sub>2</sub> gradients in opposite orientations for the two plates. If the absolute value of  
486 the difference in CI between two assays in a pair was  $\geq 0.9$ , both assays were discarded as  
487 behavior was assumed to be impacted by directional bias. Assays were also discarded if fewer  
488 than 7 animals moved to the combined scoring regions. For strain RB2575, which showed  
489 decreased motility, single assays within a pair that had more than 7 animals in the combined  
490 regions were scored and included in the analysis even if fewer than 7 animals moved in the  
491 other assay in the pair, provided there was no directional bias within the pair. In the case of the  
492 neuropeptide genes *ins-1*, *flp-2*, and *flp-17*, two independent alleles of each gene were tested in  
493 CO<sub>2</sub> chemotaxis assays. The alleles *nr2091* and *nj32* of the *ins-1* gene were used in Fig. 5b and  
494 Fig. S9b, respectively. The alleles *gk1039* and *ok3351* of the *flp-2* gene were used in Fig. 6d  
495 and Fig. S10a, respectively. The alleles *n4894* and *ok3587* of the *flp-17* gene were used in Fig.  
496 6c and Fig. S10a, respectively.

497

### 498 **Histamine assays with dauers**

499 Transgenic dauers expressing the histamine-gated chloride channel HisCl1 (Pokala et al. 2014)  
500 were isolated using 1% SDS treatment as described above. Dauers were then incubated in 20  
501 mM histamine solution (in dH<sub>2</sub>O) for 1 h prior to assays. For no-histamine control experiments,  
502 dauers were incubated in dH<sub>2</sub>O without histamine for the same duration. Dauers were then  
503 transferred onto 2% NGM plates without bacteria, with or without 20 mM histamine, and CO<sub>2</sub>  
504 chemotaxis assays were performed as described above.

505

### 506 **Calcium imaging**

507 Calcium imaging experiments were performed as previously described (Carrillo et al. 2013,  
508 Guillermin et al. 2017, Rengarajan et al. 2019) using the genetically encoded calcium indicator  
509 yellow cameleon YC3.60 (Nagai et al. 2004). To starve animals prior to imaging, young adults  
510 expressing YC3.60 were picked from NGM plates with OP50 to NGM plates without bacteria  
511 and allowed to crawl for 1 min to remove residual bacteria. Animals were then transferred to 2%  
512 NGM plates (without food) lined with an annular ring of CuCl<sub>2</sub>-soaked Whatman paper and  
513 starved for 3-6 h before imaging. Dauers for imaging were isolated by SDS treatment as  
514 described above.

515

516 For imaging, adults were immobilized onto a freshly made 2% agarose pad (made with 10 mM  
517 HEPES) on a cover glass using Meridian Surgi-Lock 20c surgical glue. Dauers were  
518 immobilized onto a dry 2% agarose pad (in 10 mM HEPES) on a cover glass since dauers are  
519 resistant to glue. A chamber fabricated from a 6 cm Petri dish with a 15 mm hole at the base  
520 and two 5 mm holes on diametrically opposite sides for gas inlets was placed around the animal  
521 and secured onto the cover glass with beeswax. The chamber was humidified using wet tissue  
522 wipes. Gases were delivered into the chamber at flow rates of 0.7-0.8 L/min (controlled by a  
523 flow meter) from two gas tanks fitted with valves controlled by a ValveBank TTL pulse  
524 generator. An air pulse (21% O<sub>2</sub>, balance N<sub>2</sub>) was delivered for 20 s, followed by a 20 s CO<sub>2</sub>  
525 pulse (15% CO<sub>2</sub>, 21% O<sub>2</sub>, balance N<sub>2</sub>) and then another air pulse (21% O<sub>2</sub>, balance N<sub>2</sub>) for 30 s.  
526 For air controls, the CO<sub>2</sub> pulse was replaced with an air pulse of equivalent duration (20 s).  
527 Imaging was performed using a Zeiss AxioObserver A1 inverted microscope equipped with a  
528 40x EC Plan-NEOFLUAR lens and a Hamamatsu C9100 EM-CCD camera. Images were  
529 acquired in the YFP and CFP channels at 2 frames/s using Zeiss AxioVision software.

530

531 Image analyses were performed using AxioVision software and Microsoft Excel. Images were  
532 analyzed by selecting regions of interest (ROIs) that consisted of either the soma (BAG, RIG,  
533 AVE) or process (AIY, AIB) of the neuron of interest and a background region. For AIY imaging,  
534 the synapse-rich part of the process previously designated as zone 2 (Colon-Ramos et al. 2007)  
535 was selected as the ROI. For AIB imaging, a segment of the process where spatiotemporal  
536 expression of INX-6 was observed in dauers (Bhattacharya et al. 2019) was selected as the  
537 ROI. The average intensity for YFP and CFP of the background region was subtracted from the  
538 average intensity for YFP and CFP of the soma or process. YFP values were adjusted to correct  
539 for CFP signal bleed-through, and the YFP/CFP ratio was then calculated. The data were  
540 baseline-adjusted for linearity using the 10 s before and after the gas stimulus as the baseline.  
541 For each dataset, the different genotypes, life stages, or conditions were tested in parallel.

542



543 For quantification, the response period was defined as the time interval beginning with the onset  
544 of the CO<sub>2</sub> pulse and ending 10 s after the offset of the CO<sub>2</sub> pulse. The %  $\Delta R/R_0$  (max) and %  
545  $\Delta R/R_0$  (min) values were calculated during the response period. For AVE imaging,  
546 categorization of responses as excitatory, inhibitory, or silent was performed using threshold  
547 values generated from air control experiments performed for each life stage or condition.  
548 Maximum and minimum threshold values were set as 3 standard deviations above the mean %  
549  $\Delta R/R_0$  (max) air response or 3 standard deviations below the mean %  $\Delta R/R_0$  (min) air response,  
550 respectively. A CO<sub>2</sub> response with a %  $\Delta R/R_0$  (max) value higher than the maximum threshold  
551 value was designated as excitatory; a response with a %  $\Delta R/R_0$  (min) value lower than the  
552 minimum threshold value was designated as inhibitory. A CO<sub>2</sub> response where the most  
553 extreme %  $\Delta R/R_0$  values were within the maximum and minimum thresholds was designated as  
554 silent. For all recordings except RIG, recordings were excluded from quantification if one or  
555 more of the %  $\Delta R/R_0$  values during the 5 s interval preceding CO<sub>2</sub> onset was outside of the  
556 range defined by  $\pm 3$  standard deviations from the mean %  $\Delta R/R_0$  (max) or %  $\Delta R/R_0$  (min) values  
557 of an air stimulus during the same time interval (air stimuli were delivered to separate sets of  
558 worms in control experiments). Heatmaps were generated using GraphPad Prism v9.1.0.  
559 Responses within heatmaps were ordered by hierarchical clustering analysis using the web-  
560 based tool Heatmapper (Babicki et al. 2016), using Euclidean distance as a similarity measure.

561

#### 562 **Statistical analysis**

563 Statistical tests were performed using GraphPad Prism v9.1.0. Specific statistical tests used are  
564 indicated in the figure legends. Normality was determined using a D'Agostino-Pearson omnibus  
565 normality test; if data were not normally distributed, non-parametric tests were used. Power  
566 analyses were performed using G\*Power v3.1.9.6 (Faul et al. 2007). We note that all replicates  
567 in this study were biological replicates, as defined by experiments involving different sets of  
568 animals; in no cases were the same animals tested more than once.

569

#### 570 **Data Availability**

571 The data that support the findings of this study are available on GitHub  
572 ([https://github.com/HallemLab/Banerjee\\_et\\_al\\_2021](https://github.com/HallemLab/Banerjee_et_al_2021)).

573

#### 574 **References**

575 Adachi, T., H. Kunitomo, M. Tomioka, H. Ohno, Y. Okochi, I. Mori and Y. Iino (2010). "Reversal  
576 of salt preference is directed by the insulin/PI3K and Gq/PKC signaling in *Caenorhabditis*  
577 *elegans*." Genetics **186**(4): 1309-1319.

578

579 Babicki, S., D. Arndt, A. Marcu, Y. J. Liang, J. R. Grant, A. Maciejewski and D. S. Wishart  
580 (2016). "Heatmapper: web-enabled heat mapping for all." Nucleic Acids Res **44**(W1): W147-  
581 W153.

582

583 Banerjee, N. and E. A. Hallem (2020). "The role of carbon dioxide in nematode behavior and  
584 physiology." Parasitology **147**: 841–854.

585

586 Beverly, M., S. Anbil and P. Sengupta (2011). "Degeneracy and neuromodulation among  
587 thermosensory neurons contribute to robust thermosensory behaviors in *Caenorhabditis*  
588 *elegans*." J Neurosci **31**(32): 11718-11727.  
589  
590 Bhattacharya, A., U. Aghayeva, E. G. Berghoff and O. Hobert (2019). "Plasticity of the electrical  
591 connectome of *C. elegans*." Cell **176**(5): 1174-1189.  
592  
593 Bradley, C. J., J. R. Strickler, E. J. Buskey and P. H. Lenz (2013). "Swimming and escape  
594 behavior in two species of calanoid copepods from nauplius to adult." J Plankton Res **35**(1): 49-  
595 65.  
596  
597 Bretscher, A. J., K. E. Busch and M. de Bono (2008). "A carbon dioxide avoidance behavior is  
598 integrated with responses to ambient oxygen and food in *Caenorhabditis elegans*." Proc Natl  
599 Acad Sci USA **105**(23): 8044-8049.  
600  
601 Brown, T. T., H. M. Lugar, R. S. Coalson, F. M. Miezin, S. E. Petersen and B. L. Schlaggar  
602 (2005). "Developmental changes in human cerebral functional organization for word  
603 generation." Cereb Cortex **15**(3): 275-290.  
604  
605 Bucher, D., A. A. Prinz and E. Marder (2005). "Animal-to-animal variability in motor pattern  
606 production in adults and during growth." J Neurosci **25**(7): 1611-1619.  
607  
608 Campbell, J. C., I. D. Chin-Sang and W. G. Bendena (2017). "A *Caenorhabditis elegans*  
609 nutritional-status based copper aversion assay." J Vis Exp **125**: e55939.  
610  
611 Carrillo, M. A., M. L. Guillermin, S. Rengarajan, R. Okubo and E. A. Hallem (2013). "O<sub>2</sub>-sensing  
612 neurons control CO<sub>2</sub> response in *C. elegans*." J Neurosci **33**: 9675-9683.  
613  
614 Carrillo, M. A. and E. A. Hallem (2015). "Gas sensing in nematodes." Mol Neurobiol **51**: 919-  
615 931.  
616  
617 Castelletto, M. L., S. S. Gang, R. P. Okubo, A. A. Tselikova, T. J. Nolan, E. G. Platzer, J. B. Lok  
618 and E. A. Hallem (2014). "Diverse host-seeking behaviors of skin-penetrating nematodes."  
619 PLoS Pathog **10**(8): e1004305.  
620  
621 Chalasani, S. H., N. Chronis, M. Tsunozaki, J. M. Gray, D. Ramot, M. B. Goodman and C. I.  
622 Bargmann (2007). "Dissecting a circuit for olfactory behaviour in *Caenorhabditis elegans*."  
623 Nature **450**(7166): 63-70.  
624  
625 Chase, D. L. and M. R. Koelle (2007). Biogenic amine neurotransmitters in *C. elegans*. In  
626 WormBook, [www.wormbook.org](http://www.wormbook.org), p. 1-15.  
627  
628 Colon-Ramos, D. A., M. A. Margeta and K. Shen (2007). "Glia promote local synaptogenesis  
629 through UNC-6 (netrin) signaling in *C. elegans*." Science **318**(5847): 103-106.  
630  
631 Cook, S. J., T. A. Jarrell, C. A. Brittin, Y. Wang, A. E. Bloniarz, M. A. Yakovlev, K. C. Q. Nguyen,  
632 L. T. Tang, E. A. Bayer, J. S. Duerr, H. E. Bulow, O. Hobert, D. H. Hall and S. W. Emmons  
633 (2019). "Whole-animal connectomes of both *Caenorhabditis elegans* sexes." Nature **571**(7763):  
634 63-71.  
635

- 636 Crook, M. (2014). "The dauer hypothesis and the evolution of parasitism: 20 years on and still  
637 going strong." Int J Parasitol **44**: 1-8.  
638
- 639 Cropper, E. C., A. M. Dacks and K. R. Weiss (2016). "Consequences of degeneracy in network  
640 function." Curr Opin Neurobiol **41**: 62-67.  
641
- 642 Faul, F., E. Erdfelder, A. G. Lang and A. Buchner (2007). "G\*Power 3: a flexible statistical power  
643 analysis program for the social, behavioral, and biomedical sciences." Behav Res Methods  
644 **39**(2): 175-191.  
645
- 646 Fielenbach, N. and A. Antebi (2008). "*C. elegans* dauer formation and the molecular basis of  
647 plasticity." Genes Dev **22**(16): 2149-2165.  
648
- 649 Goillard, J. M., A. L. Taylor, D. J. Schulz and E. Marder (2009). "Functional consequences of  
650 animal-to-animal variation in circuit parameters." Nat Neurosci **12**(11): 1424-1430.  
651
- 652 Golden, J. W. and D. L. Riddle (1984). "The *Caenorhabditis elegans* dauer larva: developmental  
653 effects of pheromone, food, and temperature." Dev Biol **102**(2): 368-378.  
654
- 655 Gordus, A., N. Pokala, S. Levy, S. W. Flavell and C. I. Bargmann (2015). "Feedback from  
656 network states generates variability in a probabilistic olfactory circuit." Cell **161**(2): 215-227.  
657
- 658 Gray, J. M., J. J. Hill and C. I. Bargmann (2005). "A circuit for navigation in *Caenorhabditis*  
659 *elegans*." Proc Natl Acad Sci USA **102**(9): 3184-3191.  
660
- 661 Guillermin, M. L., M. A. Carrillo and E. A. Hallem (2017). "A single set of interneurons drives  
662 opposite behaviors in *C. elegans*." Curr Biol **27**(17): 2630-2639  
663
- 664 Hallem, E. A., A. R. Dillman, A. V. Hong, Y. Zhang, J. M. Yano, S. F. DeMarco and P. W.  
665 Sternberg (2011). "A sensory code for host seeking in parasitic nematodes." Curr Biol **21**(5):  
666 377-383.  
667
- 668 Hallem, E. A., W. C. Spencer, R. D. McWhirter, G. Zeller, S. R. Henz, G. Ratsch, D. M. Miller, H.  
669 R. Horvitz, P. W. Sternberg and N. Ringstad (2011). "Receptor-type guanylate cyclase is  
670 required for carbon dioxide sensation by *Caenorhabditis elegans*." Proc Natl Acad Sci USA  
671 **108**(1): 254-259.  
672
- 673 Hallem, E. A. and P. W. Sternberg (2008). "Acute carbon dioxide avoidance in *Caenorhabditis*  
674 *elegans*." Proc Natl Acad Sci USA **105**(23): 8038-8043.  
675
- 676 Hamood, A. W. and E. Marder (2014). "Animal-to-animal variability in neuromodulation and  
677 circuit function." Cold Spring Harb Symp Quant Biol **79**: 21-28.  
678
- 679 Hu, P. J. (2007). Dauer. In WormBook, [www.wormbook.org](http://www.wormbook.org), p. 1-19.  
680
- 681 Jackson, D. J. and D. L. MacMillan (2000). "Tailflick escape behavior in larval and juvenile  
682 lobsters (*Homarus americanus*) and crayfish (*Cherax destructor*)." Biol Bull **198**(3): 307-318.  
683
- 684 Karp, X. (2016). Working with dauer larvae. In WormBook, [www.wormbook.org](http://www.wormbook.org), p. 1-19.  
685

- 686 Katz, M., F. Corson, S. Iwanir, D. Biron and S. Shaham (2018). "Glia modulate a neuronal circuit  
687 for locomotion suppression during sleep in *C. elegans*." Cell Rep **22**(10): 2575-2583.  
688
- 689 Kodama-Namba, E., L. A. Fenk, A. J. Bretscher, E. Gross, K. E. Busch and M. de Bono (2013).  
690 "Cross-modulation of homeostatic responses to temperature, oxygen and carbon dioxide in *C.*  
691 *elegans*." PLoS Genet **9**(12): e1004011.  
692
- 693 Lee, J., A. R. Dillman and E. A. Hallem (2016). "Temperature-dependent changes in the host-  
694 seeking behaviors of parasitic nematodes." BMC Biol **14**: 36.  
695
- 696 Lee, J. S., P. Y. Shih, O. N. Schaedel, P. Quintero-Cadena, A. K. Rogers and P. W. Sternberg  
697 (2017). "FMRFamide-like peptides expand the behavioral repertoire of a densely connected  
698 nervous system." Proc Natl Acad Sci USA **114**(50): E10726-E10735.  
699
- 700 Li, C. and K. Kim (2008). Neuropeptides. In WormBook, [www.wormbook.org](http://www.wormbook.org), p. 1-36.  
701
- 702 Liu, P., B. Chen, R. Mailler and Z. W. Wang (2017). "Antidromic-rectifying gap junctions amplify  
703 chemical transmission at functionally mixed electrical-chemical synapses." Nat Commun **8**:  
704 14818.  
705
- 706 Lustigman, S., R. K. Prichard, A. Gazzinelli, W. N. Grant, B. A. Boatman, J. S. McCarthy and M. G.  
707 Basanez (2012). "A research agenda for helminth diseases of humans: the problem of  
708 helminthiasis." PLoS Negl Trop Dis **6**(4): e1582.  
709
- 710 Marder, E., M. L. Goeritz and A. G. Otopalik (2015). "Robust circuit rhythms in small circuits  
711 arise from variable circuit components and mechanisms." Curr Opin Neurobiol **31**: 156-163.  
712
- 713 Nagai, T., S. Yamada, T. Tominaga, M. Ichikawa and A. Miyawaki (2004). "Expanded dynamic  
714 range of fluorescent indicators for Ca<sup>2+</sup> by circularly permuted yellow fluorescent proteins." Proc  
715 Natl Acad Sci USA **101**(29): 10554-10559.  
716
- 717 Pereira, H. S. and M. B. Sokolowski (1993). "Mutations in the larval foraging gene affect adult  
718 locomotory behavior after feeding in *Drosophila melanogaster*." Proc Natl Acad Sci USA **90**(11):  
719 5044-5046.  
720
- 721 Piggott, B. J., J. Liu, Z. Feng, S. A. Wescott and X. Z. Xu (2011). "The neural circuits and  
722 synaptic mechanisms underlying motor initiation in *C. elegans*." Cell **147**(4): 922-933.  
723
- 724 Pokala, N., Q. Liu, A. Gordus and C. I. Bargmann (2014). "Inducible and titratable silencing of  
725 *Caenorhabditis elegans* neurons *in vivo* with histamine-gated chloride channels." Proc Natl  
726 Acad Sci USA **111**(7): 2770-2775.  
727
- 728 Prinz, A. A., D. Bucher and E. Marder (2004). "Similar network activity from disparate circuit  
729 parameters." Nat Neurosci **7**(12): 1345-1352.  
730
- 731 Rengarajan, S., K. A. Yankura, M. L. Guillermin, W. Fung and E. A. Hallem (2019). "Feeding  
732 state sculpts a circuit for sensory valence in *Caenorhabditis elegans*." Proc Natl Acad Sci USA  
733 **116**(5): 1776-1781.  
734
- 735 Rodriguez, J. C., D. M. Blitz and M. P. Nusbaum (2013). "Convergent rhythm generation from  
736 divergent cellular mechanisms." J Neurosci **33**(46): 18047-18064.

737  
738 Ruiz, F., M. L. Castelletto, S. S. Gang and E. A. Hallem (2017). "Experience-dependent  
739 olfactory behaviors of the parasitic nematode *Heligmosomoides polygyrus*." PLoS Pathog  
740 **13**(11): e1006709.  
741  
742 Saideman, S. R., D. M. Blitz and M. P. Nusbaum (2007). "Convergent motor patterns from  
743 divergent circuits." J Neurosci **27**(25): 6664-6674.  
744  
745 Schafer, T. W. and A. Skopic (2006). "Parasites of the small intestine." Curr Gastroenterol Rep  
746 **8**(4): 312-320.  
747  
748 Scott, K. (2011). "Out of thin air: sensory detection of oxygen and carbon dioxide." Neuron  
749 **69**(2): 194-202.  
750  
751 Serrano-Saiz, E., R. J. Poole, T. Felton, F. Zhang, E. D. De La Cruz and O. Hobert (2013).  
752 "Modular control of glutamatergic neuronal identity in *C. elegans* by distinct homeodomain  
753 proteins." Cell **155**(3): 659-673.  
754  
755 Sieburth, D., Q. Ch'ng, M. Dybbs, M. Tavazoie, S. Kennedy, D. Wang, D. Dupuy, J. F. Rual, D.  
756 E. Hill, M. Vidal, G. Ruvkun and J. M. Kaplan (2005). "Systematic analysis of genes required for  
757 synapse structure and function." Nature **436**(7050): 510-517.  
758  
759 Sieburth, D., J. M. Madison and J. M. Kaplan (2007). "PKC-1 regulates secretion of  
760 neuropeptides." Nat Neurosci **10**(1): 49-57.  
761  
762 Smith, E. S., L. Martinez-Velazquez and N. Ringstad (2013). "A chemoreceptor that detects  
763 molecular carbon dioxide." J Biol Chem **288**(52): 37071-37081.  
764  
765 Stern, S., C. Kirst and C. I. Bargmann (2017). "Neuromodulatory control of long-term behavioral  
766 patterns and individuality across development." Cell **171**(7): 1649-1662 e1610.  
767  
768 Stiernagle, T. (2006). Maintenance of *C. elegans*. In WormBook, [www.wormbook.org](http://www.wormbook.org), p. 1-11.  
769  
770 Summers, P. J., R. M. Layne, A. C. Ortega, G. P. Harris, B. A. Bamber and R. W. Komuniecki  
771 (2015). "Multiple sensory inputs are extensively integrated to modulate nociception in *C.*  
772 *elegans*." J Neurosci **35**(28): 10331-10342.  
773  
774 Tomioka, M., T. Adachi, H. Suzuki, H. Kunitomo, W. R. Schafer and Y. Iino (2006). "The  
775 insulin/PI 3-kinase pathway regulates salt chemotaxis learning in *Caenorhabditis elegans*."  
776 Neuron **51**(5): 613-625.  
777  
778 Trojanowski, N. F., O. Padovan-Merhar, D. M. Raizen and C. Fang-Yen (2014). "Neural and  
779 genetic degeneracy underlies *Caenorhabditis elegans* feeding behavior." J Neurophysiol **112**(4):  
780 951-961.  
781  
782 Varshney, L. R., B. L. Chen, E. Paniagua, D. H. Hall and D. B. Chklovskii (2011). "Structural  
783 properties of the *Caenorhabditis elegans* neuronal network." PLoS Comput Biol **7**(2): e1001066.  
784  
785 Wang, Y., K. R. Weiss and E. C. Cropper (2019). "Network degeneracy and the dynamics of  
786 task switching in the feeding circuit in *Aplysia*." J Neurosci **39**(44): 8705-8716.  
787



788 White, J. G., E. Southgate, J. N. Thomson and S. Brenner (1986). "The structure of the nervous  
789 system of the nematode *Caenorhabditis elegans*." Philos Trans R Soc Lond B **314**(1165): 1-  
790 340.

791  
792 Witvliet, D., B. Mulcahy, J. K. Mitchell, Y. Meirovitch, D. R. Berger, Y. Wu, Y. Liu, W. Xian Koh,  
793 R. Parvathala, D. Holmyard, R. L. Schalek, N. Shavit, A. D. Chisholm, J. W. Lichtman, A. D. T.  
794 Samuel and M. Zhen (2021). "Connectomes across development reveal principles of brain  
795 maturation." *Nature*, <https://doi.org/10.1038/s41586-021-03778-8>.

796  
797 Yeon, J., A. Takeishi and P. Sengupta (2021). "Chronic vs acute manipulations reveal  
798 degeneracy in a thermosensory neuron network." MicroPubl Biol **2021**.

799  
800 **Acknowledgements**  
801 We thank the *Caenorhabditis* Genetics Centre, the *C. elegans* Knockout Consortium, Oliver  
802 Hobert, Cori Bargmann, Gary Ruvkun, Shai Shaham, Ikue Mori, Yuichi Iino, and Mario de Bono  
803 for strains. We thank Astra Bryant, Michelle Castelletto, and Ricardo Frausto for insightful  
804 comments on the manuscript. This work was funded by NIH F32 AI147617 (N.B.), NIH MARC  
805 T34 GM008563 (E.R.P.), NIH UF1 NS111697 (P.W.S.), and NIH R01 DC017959 and an HHMI  
806 Faculty Scholar Award (E.A.H.).

807  
808 **Author Contributions**  
809 N.B., P.-Y.S., P.W.S., and E.A.H. conceived the study. N.B. and E.R.P. performed experiments.  
810 N.B. and E.R.P. analyzed the data. N.B., E.R.P., and E.A.H. wrote the manuscript. All authors  
811 read and approved the final manuscript.

812  
813 **Competing Interests**  
814 The authors declare no competing interests.

815  
816 **Corresponding Author**  
817 Correspondence to Elissa A. Hallem.

818  
819 **Figure Legends**

820 **Fig 1. The RIG, AIB, and AVE interneurons regulate CO<sub>2</sub> attraction in dauers.** **a.** Well-fed  
821 adults are repelled by CO<sub>2</sub>, whereas starved adults and dauers are attracted to CO<sub>2</sub>. n = 16-18  
822 trials per life stage and condition. \*\*\*\**p*<0.0001, ns = not significant (*p*>0.9999), Kruskal-Wallis  
823 test with Dunn's post-test. **b.** The interneurons RIG, AIB, and AVE promote CO<sub>2</sub> attraction in  
824 dauers. Strains where specific pairs of interneurons were genetically ablated (A1Y<sup>-</sup>, RIG<sup>-</sup>, RIA<sup>-</sup>,  
825 or AIB<sup>-</sup>) or silenced with tetanus toxin (AVE::TeTx) were used. \*\*\*\**p*<0.0001, \**p*<0.05, ns = not  
826 significant (*p* = 0.8334 for wild type vs. A1Y<sup>-</sup>, *p* = 0.3878 for wild type vs. RIA<sup>-</sup>), one-way ANOVA  
827 with Dunnett's post-test. n = 14-22 trials per genotype. For a-b, each data point represents a  
828 single chemotaxis assay. Solid lines indicate medians and dotted lines indicate interquartile  
829 ranges. Responses shown are to 10% CO<sub>2</sub>. **c.** Behavioral responses of animals with genetically  
830 ablated AIB neurons (AIB<sup>-</sup>) in CO<sub>2</sub> chemotaxis assays. \*\*\*\**p*<0.0001, ns = not significant  
831 (*p*>0.3), two-way ANOVA with Sidak's post-test. n = 12-22 assays per life stage and condition.  
832 Each data point represents a single chemotaxis assay. Solid lines in violin plots show medians  
833 and dotted lines show interquartile ranges. Responses are to 10% CO<sub>2</sub>. **d.** Behavioral  
834 responses of animals expressing tetanus toxin specifically in the AVE neurons (AVE::TeTx) in  
835 CO<sub>2</sub> chemotaxis assays. \*\*\*\**p*<0.0001, ns = not significant (*p*>0.06), two-way ANOVA with  
836 Sidak's post-test. n = 10-22 assays per life stage and condition. Conventions and conditions are  
837 as in panel c.

838  
839 **Fig 2. The RIG and AIY interneurons respond similarly to CO<sub>2</sub> in well-fed adults and**  
840 **dauers. a.** CO<sub>2</sub>-evoked calcium responses of RIG in well-fed adults and dauers. Each row  
841 within the heatmaps represents the response of an individual animal. Response magnitudes are  
842 color-coded according to the scale (%  $\Delta R/R_0$ ) shown to the right. Responses are ordered by  
843 hierarchical cluster analysis. Gray bars indicate the timing and duration of the CO<sub>2</sub> pulse.  
844 Calcium responses were measured using the ratiometric calcium indicator yellow cameleon  
845 YC3.60. Responses are to 15% CO<sub>2</sub>. **b.** Quantification of the maximum responses of RIG in  
846 well-fed adults and dauers. ns = not significant ( $p = 0.8989$ ), Welch's  $t$ -test. Each data point  
847 represents the response of a single animal. Solid lines in violin plots show medians and dotted  
848 lines show interquartile ranges.  $n = 14$ -15 animals per life stage. **c.** CO<sub>2</sub>-evoked calcium  
849 responses of AIY in well-fed adults and dauers. Conventions and conditions are as in panel a.  
850 **d.** Quantification of the minimum responses of AIY in well-fed adults and dauers. ns = not  
851 significant ( $p = 0.7377$ ), Mann-Whitney test. Conventions are as in panel b.  $n = 11$ -14 animals  
852 per life stage.

853  
854 **Fig 3. The AIB interneurons promote CO<sub>2</sub> attraction specifically in dauers. a.** The AIB  
855 interneurons show excitatory activity in dauers. Calcium responses of AIB in well-fed adults,  
856 starved adults, and dauers. Each row represents the response of an individual animal.  
857 Response magnitudes in the heatmaps are color coded according to the scale (%  $\Delta R/R_0$ ) shown  
858 to the right. Responses are ordered by hierarchical cluster analysis. Gray bars indicate timing  
859 and duration of the CO<sub>2</sub> pulse. Calcium responses were measured using the ratiometric calcium  
860 indicator yellow cameleon YC3.60. Responses are to 15% CO<sub>2</sub>. **b.** Quantification of maximum  
861 responses of AIB in well-fed adults, starved adults, and dauers. \*\* $p < 0.01$ , ns = not significant  
862 ( $p > 0.9999$ ), Kruskal Wallis test with Dunn's post-test. Lines in graphs show medians and  
863 interquartile ranges.  $n = 13$ -17 animals per life stage and condition. **c.** A gap junction complex is  
864 formed between the BAG sensory neurons and AIB interneurons in dauers by selective  
865 expression of the innexin subunit INX-6 in AIB. INX-6 partners with the innexin subunit CHE-7,  
866 which is expressed in BAG, to form gap junctions (Bhattacharya et al. 2019). **d.** Excitatory CO<sub>2</sub>-  
867 evoked calcium responses in AIB are largely eliminated in *che-7(ok2373)* mutant dauers.  
868 Conventions and imaging conditions are as in panel a. **e.** Quantification of maximum responses  
869 of AIB in wild-type and *che-7(ok2373)* dauers. Conventions and conditions are as in b. \*\* $p < 0.01$ ,  
870 Welch's  $t$ -test.  $n = 15$ -17 animals per genotype. **f.** Behavioral responses of AIB-ablated (AIB-)  
871 dauers, dauers containing an AIB-specific knockout of *inx-6* (*inx-6<sup>AIB OFF</sup>*) (Bhattacharya et al.  
872 2019), and *che-7(ok2373)* mutant dauers in CO<sub>2</sub> chemotaxis assays. \*\* $p < 0.01$ , \*\*\* $p < 0.001$ ,  
873 \*\*\*\* $p < 0.0001$ , one-way ANOVA with Dunnett's post-test.  $n = 14$ -22 trials per genotype. Each  
874 data point represents a single chemotaxis assay. Solid lines indicate medians and dotted lines  
875 indicate interquartile ranges. Responses are to 10% CO<sub>2</sub>.

876  
877 **Fig 4. The AVE interneurons promote CO<sub>2</sub> attraction specifically in dauers. a.** Calcium  
878 responses in the AVE neurons of well-fed adults, starved adults, and dauers. Response  
879 magnitudes in the heatmaps are color-coded according to the scales (%  $\Delta R/R_0$ ) shown to the  
880 right. Responses are ordered by hierarchical cluster analysis. Gray bars indicate the timing and  
881 duration of the CO<sub>2</sub> pulse. Calcium responses were measured using the ratiometric calcium  
882 indicator yellow cameleon YC3.60. Responses are to 15% CO<sub>2</sub>. **b.** Quantification of minimum  
883 responses of AVE in well-fed adults, starved adults, and dauers. \*\*\* $p < 0.001$ , ns = not significant  
884 ( $p = 0.9813$ ), one-way ANOVA with Dunnett's post-test. **c.** Quantification of maximum  
885 responses of AVE in well-fed adults, starved adults, and dauers. \* $p < 0.05$ , ns = not significant  
886 ( $p > 0.9999$  for well-fed adults vs. starved adults,  $p = 0.1714$  for well-fed adults vs. dauers),  
887 Kruskal Wallis test with Dunn's post-test. In b-c, each data point represents the response of a  
888 single animal. Solid lines in violin plots show medians and dotted lines show interquartile

889 ranges. **d.** Categorical plot displaying the percentage of excitatory, inhibitory, and silent  
890 responses in AVE across life stages and conditions.  $**p < 0.01$  for inhibitory responses of dauers  
891 vs. well-fed adults,  $**p < 0.01$  for inhibitory responses of dauers vs. starved adults, ns = not  
892 significant ( $p > 0.9999$ ) for inhibitory responses of well-fed adults vs starved adults, Fisher's exact  
893 test. For a-d,  $n = 13-16$  animals per life stage and condition.

894  
895 **Fig 5. Insulin signaling establishes CO<sub>2</sub> responses across life stages.** **a.** DAF-2 establishes  
896 CO<sub>2</sub> repulsion in well-fed adults and CO<sub>2</sub> attraction in dauers.  $****p < 0.0001$ , ns = not significant  
897 ( $p = 0.1202$ ), two-way ANOVA with Sidak's post-test.  $n = 12-18$  assays per life stage and  
898 condition. **b.** INS-1 promotes CO<sub>2</sub> attraction in dauers.  $***p < 0.001$ , ns = not significant ( $p > 0.1$ ),  
899 two-way ANOVA with Sidak's post-test.  $n = 12-18$  assays per life stage and condition. For a-b,  
900 graphs show the behavioral responses of *daf-2(e1370)* and *ins-1(nr2091)* mutants across life  
901 stages and conditions in CO<sub>2</sub> chemotaxis assays. Each data point represents a single  
902 chemotaxis assay. Solid lines in violin plots show medians and dotted lines show interquartile  
903 ranges. Responses are to 10% CO<sub>2</sub>. **c.** CO<sub>2</sub>-evoked calcium responses of the RIG neurons of  
904 wild-type and *daf-2(e1370)* mutant well-fed adults and dauers. Response magnitudes in the  
905 heatmaps are color-coded according to the scales (%  $\Delta R/R_0$ ) shown to the right. Responses are  
906 ordered by hierarchical cluster analysis. Gray bars indicate the timing and duration of the CO<sub>2</sub>  
907 pulse. Calcium responses were measured using the ratiometric calcium indicator yellow  
908 cameleon YC3.60. Responses are to 15% CO<sub>2</sub>. **d.** Quantification of the maximum responses of  
909 RIG in wild-type and *daf-2(e1370)* mutant dauers and well-fed adults.  $*p < 0.05$ , ns = not  
910 significant ( $p = 0.7649$ ), two-way ANOVA with Sidak's post-test.  $n = 12-15$  animals per life stage  
911 and genotype. **e.** CO<sub>2</sub>-evoked calcium responses of the AIB neurons of wild-type and *daf-*  
912 *2(e1370)* mutant dauers and well-fed adults. Conventions and conditions are as in panel c. **f.**  
913 Quantification of the maximum responses of AIB in wild-type and *daf-2(e1370)* mutant well-fed  
914 adults and dauers. Conventions are as in panel d.  $***p < 0.001$ , ns = not significant ( $p = 0.8081$ ),  
915 two-way ANOVA with Sidak's post-test.  $n = 11-20$  animals per life stage and genotype.

916  
917 **Fig 6. Both shared and distinct molecular signals establish CO<sub>2</sub> attraction in dauers and**  
918 **starved adults.** Behavioral responses of starved adults and dauers containing loss-of-function  
919 mutations in the vesicular glutamate transporter gene *eat-4* (**a**), the tyrosine decarboxylase  
920 gene *tdc-1* (**b**), the neuropeptide gene *flp-17* (**c**), or the neuropeptide gene *flp-2* (**d**) in CO<sub>2</sub>  
921 chemotaxis assays.  $****p < 0.0001$ ,  $***p < 0.001$ , ns = not significant ( $p > 0.9$ ), two-way ANOVA with  
922 Sidak's post-test.  $n = 12-20$  assays per life stage and genotype. Each data point represents a  
923 single chemotaxis assay. Solid lines in violin plots show medians and dotted lines show  
924 interquartile ranges. Responses are to 10% CO<sub>2</sub>.

925  
926 **Fig 7. Distinct mechanisms shape CO<sub>2</sub> response across life stages.** **a.** Table showing the  
927 CO<sub>2</sub>-evoked activity of the BAG sensory neurons and downstream interneurons associated with  
928 CO<sub>2</sub> repulsion (yellow) in well-fed adults and CO<sub>2</sub> attraction (light blue) in starved adults and  
929 dauers. Excitatory and inhibitory neural activity is indicated by dark blue and orange shading,  
930 respectively. Non-responsive neurons are indicated by gray shading; neurons whose CO<sub>2</sub>-  
931 evoked calcium activity has not been examined because the neurons are not required for CO<sub>2</sub>-  
932 evoked behavior are indicated by white shading. For AVE interneuron, color codes indicate  
933 predominant calcium responses across life stages. **b.** Table showing the requirement for  
934 different molecular signals in establishing CO<sub>2</sub> response across life stages. Neurotransmitters  
935 and neuropeptides required to establish CO<sub>2</sub> repulsion and CO<sub>2</sub> attraction are indicated by  
936 yellow and blue shading, respectively. The lack of requirement for a particular molecular signal  
937 in establishing CO<sub>2</sub> response is indicated by white shading.

938

**Figure 1**

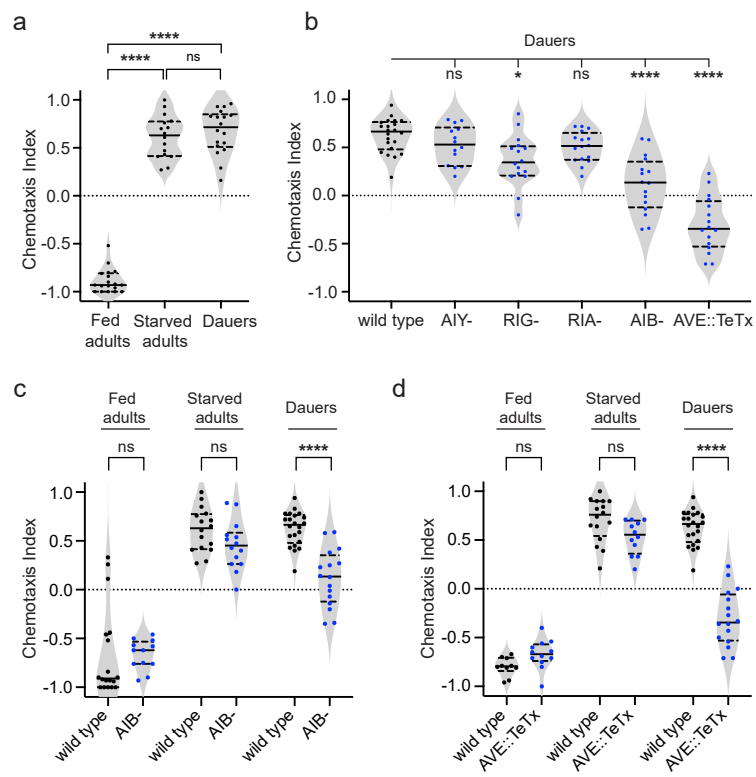

**Figure 2**

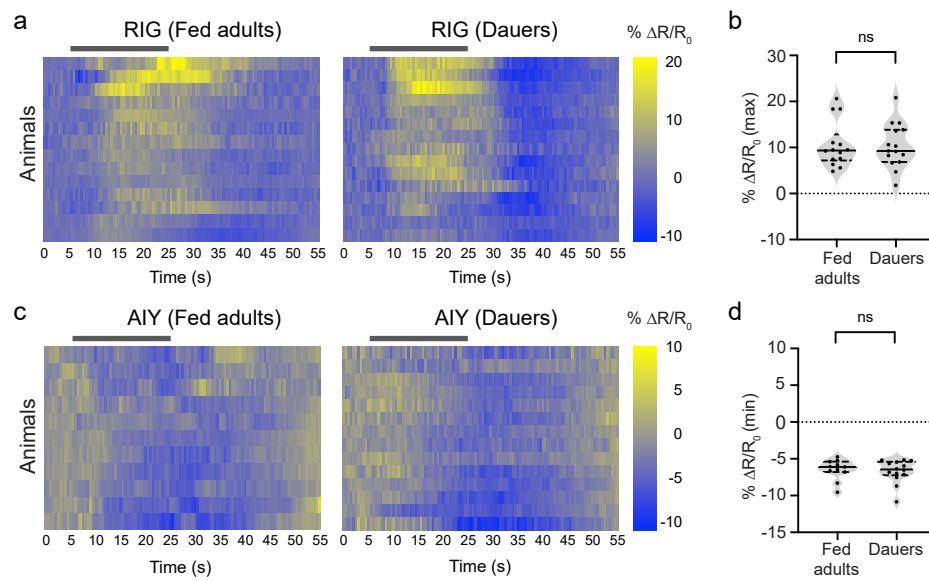



**Figure 3**

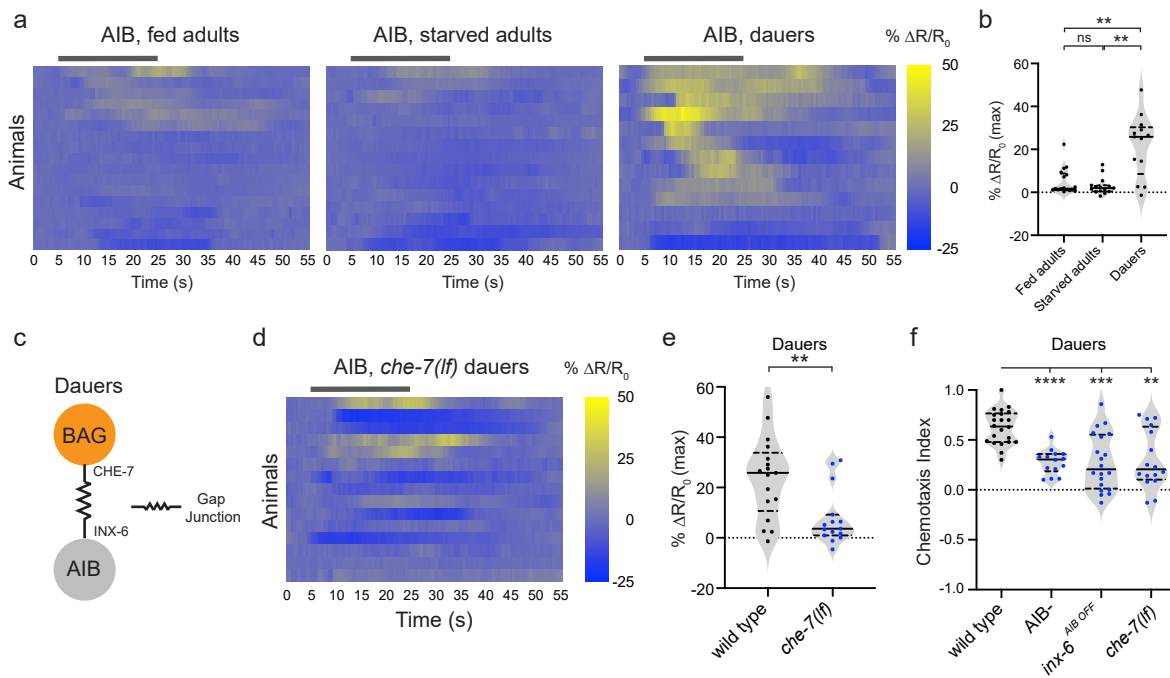

**Figure 4**

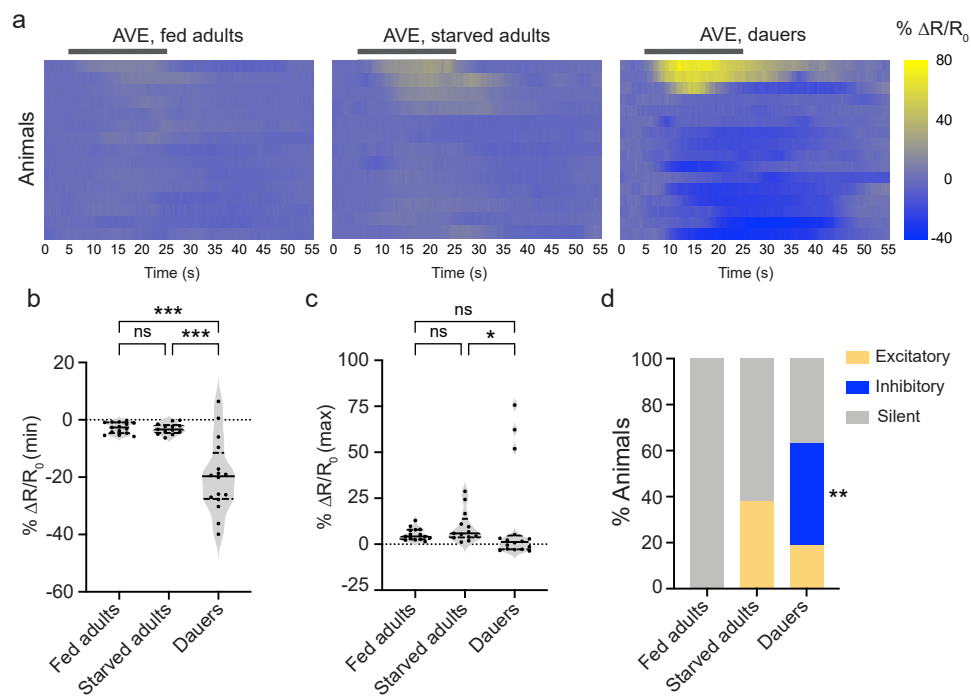

**Figure 5**

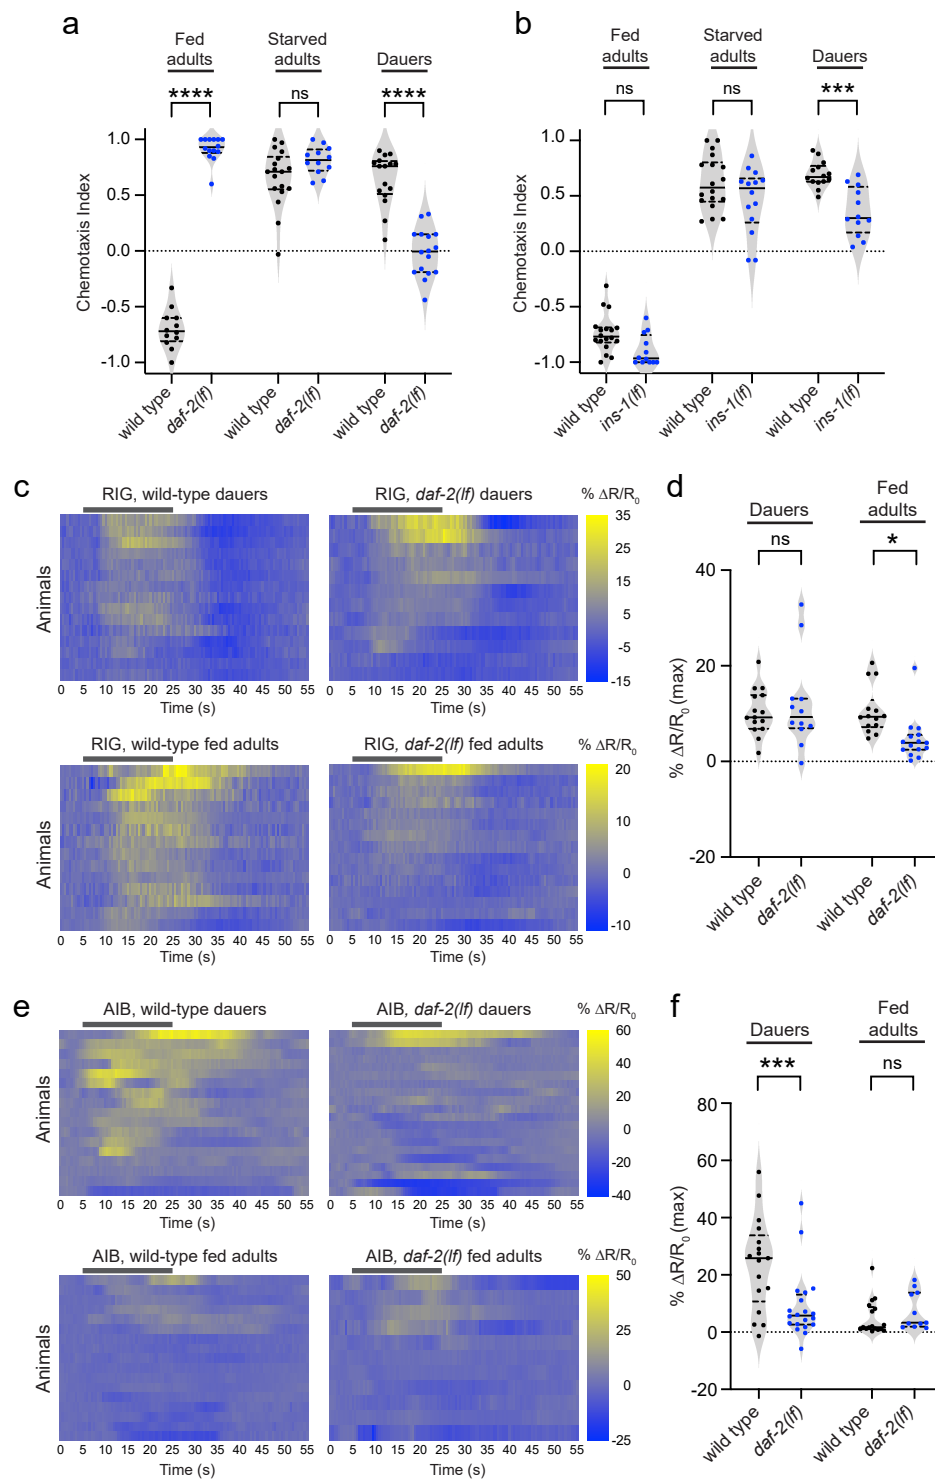

**Figure 6**

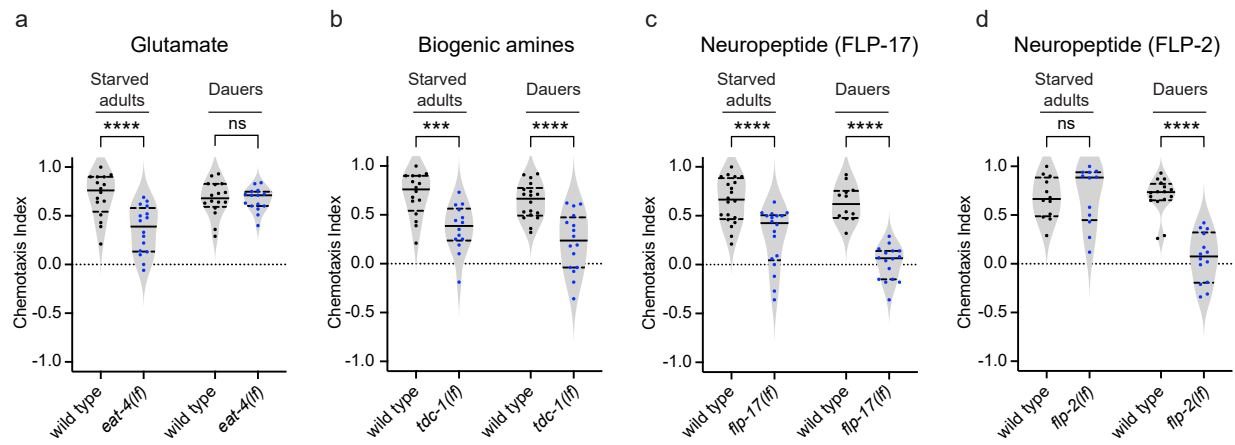

**Figure 7**

a

| Life stage / Condition | Sensory neuron                                                                     | Interneuron                                                                        |                                                                                    |                                                                                    |                                                                                    |                                                                                      | Behavior                   |
|------------------------|------------------------------------------------------------------------------------|------------------------------------------------------------------------------------|------------------------------------------------------------------------------------|------------------------------------------------------------------------------------|------------------------------------------------------------------------------------|--------------------------------------------------------------------------------------|----------------------------|
| Fed adults             |   |   |   |   |   |   | CO <sub>2</sub> repulsion  |
| Starved adults         |   |   |   |   |   |   | CO <sub>2</sub> attraction |
| Dauers                 |  |  |  |  |  |  | CO <sub>2</sub> attraction |

b

| Life stage / Condition | Molecular signals |        |                 |        |       |       |       |       | Behavior                   |
|------------------------|-------------------|--------|-----------------|--------|-------|-------|-------|-------|----------------------------|
| Fed adults             | Glutamate         | FLP-17 | Biogenic amines | FLP-16 | NLP-1 | FLP-2 | INS-1 | DAF-2 | CO <sub>2</sub> repulsion  |
| Starved adults         | Glutamate         | FLP-17 | Biogenic amines | FLP-16 | NLP-1 | FLP-2 | INS-1 | DAF-2 | CO <sub>2</sub> attraction |
| Dauers                 | Glutamate         | FLP-17 | Biogenic amines | FLP-16 | NLP-1 | FLP-2 | INS-1 | DAF-2 | CO <sub>2</sub> attraction |



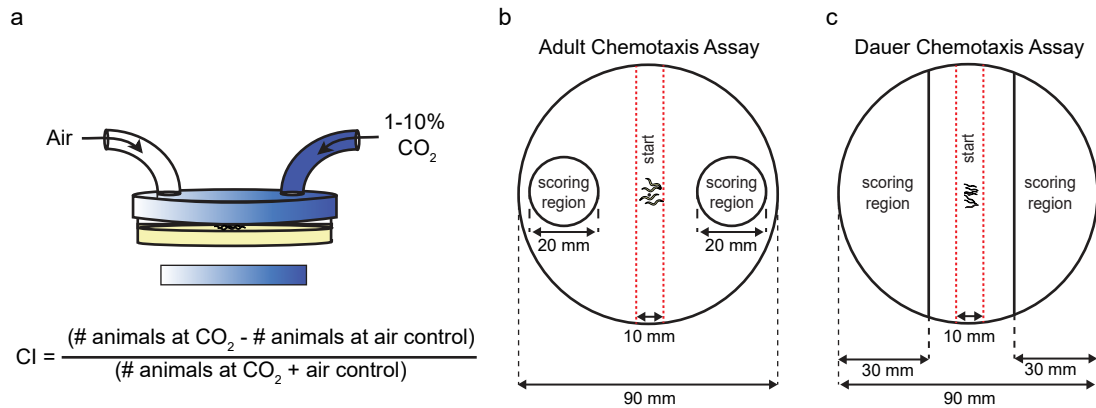

**Fig S1. CO<sub>2</sub> chemotaxis assays for *C. elegans* adults and dauers.** **a.** Schematic of the CO<sub>2</sub> chemotaxis assay. Animals were placed in the center of a 90 mm NGM agar plate. A CO<sub>2</sub> gradient was established by delivering the specified gas mixtures through holes in either side of the plate lid. Animals were allowed to navigate in the CO<sub>2</sub> gradient (indicated by the shaded rectangle below). At the end of each assay, animals on each side of the plate were counted and results were scored as a Chemotaxis Index (CI) according to the formula indicated. Adapted from Guillermin *et al.*, 2017. **b.** For adult assays, the number of animals within a 20 mm diameter circle centered under each gas inlet was counted. **c.** For dauer assays, the number of animals within the indicated 30 mm segments on both sides of the plate was counted. For b-c, dashed red lines indicate the area within which animals were placed at the beginning of the assay.

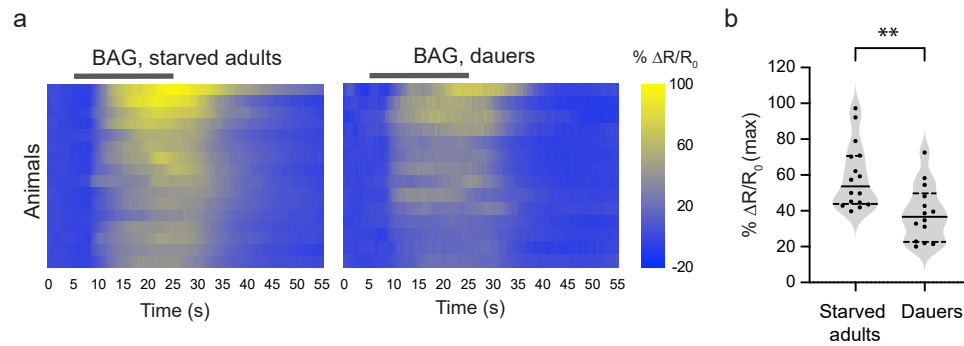

**Fig S2. The BAG sensory neurons show similar excitatory activity in starved adults and dauers.** **a.** Calcium responses in the BAG neurons of starved adults and dauers. Each row represents the response of an individual animal. Response magnitudes in the heatmaps are color-coded according to the scales (%  $\Delta R/R_0$ ) shown to the right. Responses are ordered by hierarchical cluster analysis. Gray bars indicate the timing and duration of the CO<sub>2</sub> pulse. **b.** Quantification of the maximum responses of BAG in starved adults and dauers. Each data point represents the response of a single animal. Solid lines in violin plots show medians and dotted lines show interquartile ranges. \*\* $p < 0.01$ , Welch's t-test.  $n = 14-16$  animals per life stage. Responses are to 15% CO<sub>2</sub>.

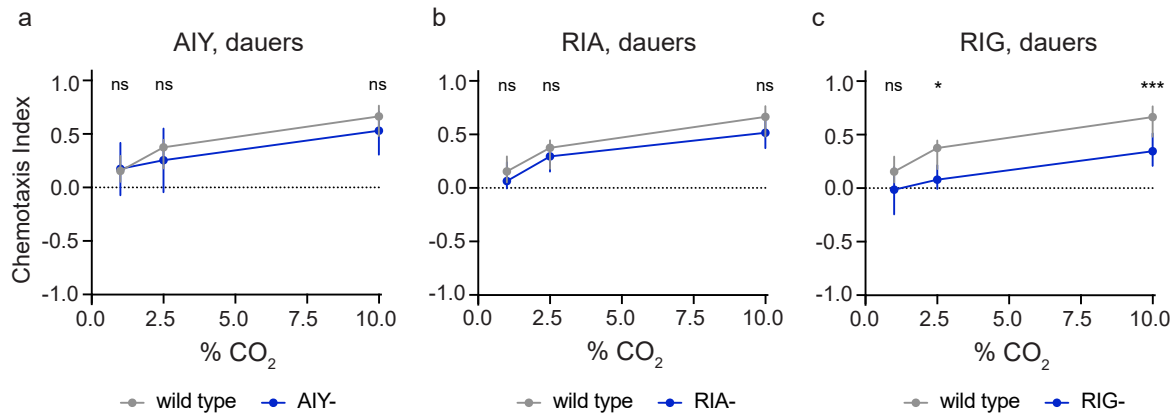

**Fig S3. RIG interneurons, but not AIY and RIA interneurons, promote CO<sub>2</sub> attraction in dauers.** Behavioral responses of dauers with genetically ablated AIY (AIY-), RIA (RIA-), and RIG (RIG-) neurons to CO<sub>2</sub> across concentrations. n=12-22 trials per genotype. \* $p < 0.01$ , \*\*\* $p < 0.001$ , ns = not significant ( $p > 0.05$ ), two-way ANOVA test with Sidak's post-test. Graphs show medians and interquartile ranges.

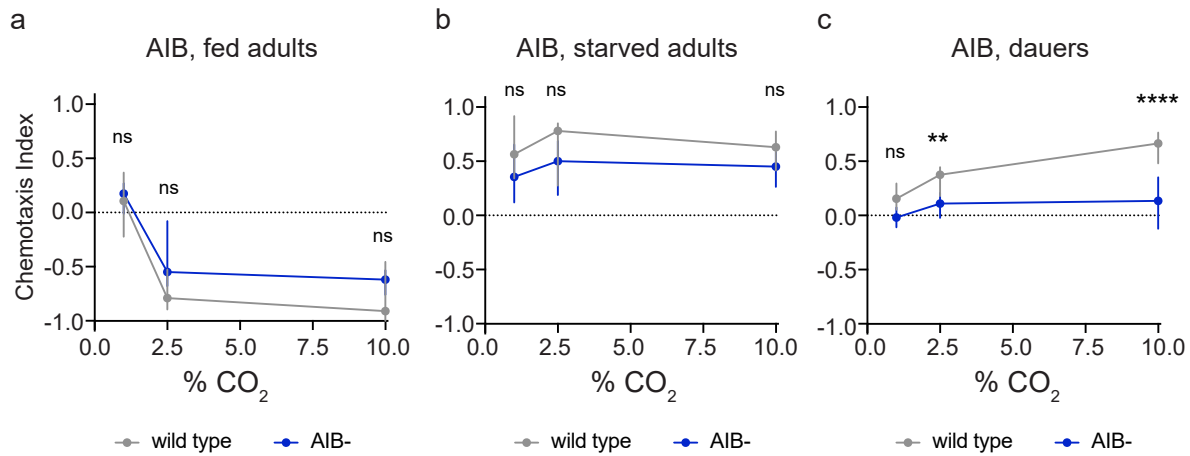

**Fig S4. AIB interneurons promote CO<sub>2</sub> attraction specifically in dauers.** Behavioral responses of AIB-ablated (AIB-) well-fed adults, starved adults, and dauers in CO<sub>2</sub>-chemotaxis assays. \*\* $p < 0.01$ , \*\*\*\* $p < 0.0001$ , ns = not significant ( $p > 0.05$ ), two-way ANOVA with Sidak's post-test. Graphs show medians and interquartile ranges.  $n = 12-22$  trials per life stage and condition.

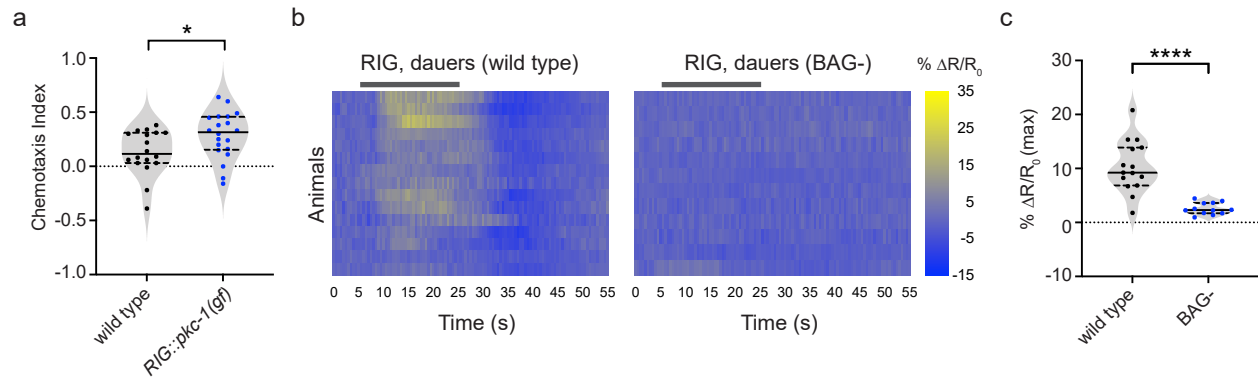

**Fig S5. RIG activity promotes CO<sub>2</sub> attraction in dauers and is dependent on BAG signaling.**

**a.** Dauers with RIG-specific expression of a *pkc-1(gain-of-function)* allele show significantly enhanced CO<sub>2</sub> attraction compared to wild-type dauers. \* $p < 0.05$ , Welch's *t*-test.  $n = 18-20$  trials per genotype. Each data point represents a single chemotaxis assay. Solid lines in violin plots show medians and dotted lines show interquartile ranges. Responses are to 1% CO<sub>2</sub>. **b.** Calcium responses in RIG neurons in wild-type vs BAG-ablated (BAG-) dauers. Gray bars indicate the timing and duration of the CO<sub>2</sub> pulse. Each row represents the response of an individual animal. Response magnitudes in the heatmaps are color-coded according to the scale (% ΔR/R<sub>0</sub>) shown to the right. Responses are ordered by hierarchical cluster analysis. **c.** Quantification of the maximum responses of RIG in wild-type and BAG- dauers. Each data point represents the response of a single animal. Solid lines in violin plots show medians and dotted lines show interquartile ranges. \*\*\*\* $p < 0.0001$ , Welch's *t*-test.  $n = 12-15$  animals per genotype. For b-c, responses are to 15% CO<sub>2</sub>.



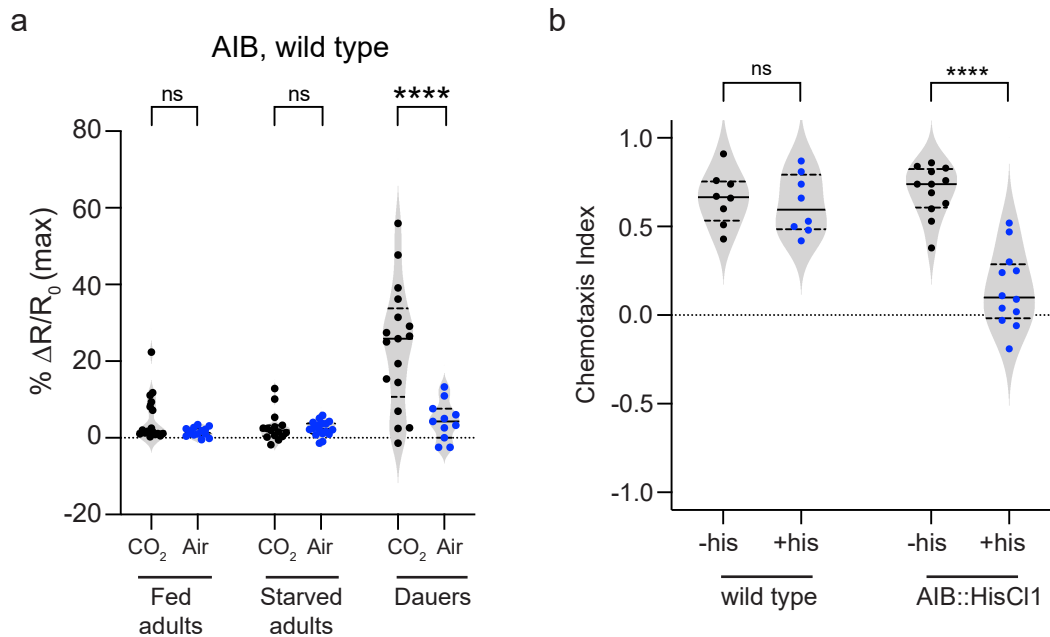

**Fig S6. Excitatory responses in the AIB interneurons of dauers are evoked by CO<sub>2</sub>.** **a.** Quantification of the maximum calcium responses of AIB in well-fed adults, starved adults, and dauers to CO<sub>2</sub> (15% CO<sub>2</sub>, 21% O<sub>2</sub>, balance N<sub>2</sub>) vs. air (21% O<sub>2</sub>, balance N<sub>2</sub>). Only dauers show CO<sub>2</sub>-evoked activity in AIB. \*\*\*\* $p < 0.0001$ , ns = not significant ( $p > 0.5$ ), 2-way ANOVA with Sidak's post-test. **b.** Transient silencing of AIB neurons reduces CO<sub>2</sub> attraction in dauers. Behavioral responses of wild-type dauers and transgenic dauers with AIB-specific expression of HisCl1 in CO<sub>2</sub> chemotaxis assays. Dauers expressing HisCl1 in AIB (AIB::HisCl1) show significantly reduced CO<sub>2</sub> attraction when treated with exogenous histamine (+his) compared to untreated controls (-his). \*\*\*\* $p < 0.0001$ , ns = not significant ( $p = 0.9993$ ), two-way ANOVA with Sidak's post-test.  $n = 8-12$  animals per genotype and condition. Each data point represents a single chemotaxis assay. Solid lines in violin plots show medians and dotted lines show interquartile ranges. Responses are to 10% CO<sub>2</sub>.

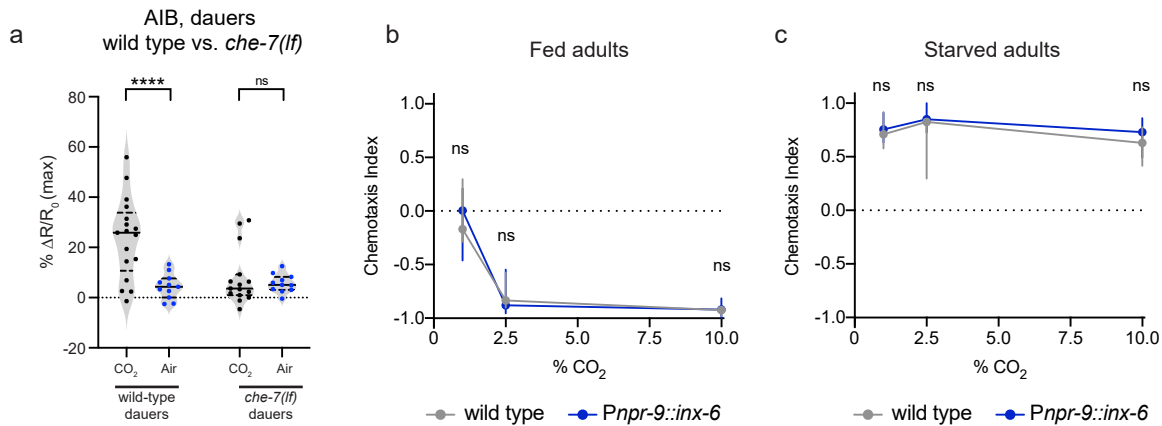

**Fig S7. The BAG-AIB gap junction is required for CO<sub>2</sub>-evoked activity in AIB and modulates CO<sub>2</sub>-evoked behavior specifically in dauers.** **a.** Quantification of the maximum calcium responses of AIB in *che-7(ok2373)* mutants in response to CO<sub>2</sub> vs. air. Wild-type but not *che-7(lf)* dauers show CO<sub>2</sub>-evoked activity in AIB. \*\*\*\* $p < 0.0001$ , ns = not significant ( $p = 0.8571$ ), two-way ANOVA with Sidak's post-test. For a-b, each data point represents the response of a single animal. Solid lines in violin plots show medians and dotted lines show interquartile ranges.  $n = 11-18$  animals per genotype and condition. **b-c.** Ectopic expression of INX-6 in AIB does not alter CO<sub>2</sub> responses in adults. Behavioral responses of well-fed adults (**b**) and starved adults (**c**) expressing *inx-6* specifically in AIB under the control of the *npr-9* promoter (*Pnpr-9::inx-6*) in CO<sub>2</sub>-chemotaxis assays across concentrations.  $n = 10-16$  animals per genotype and condition. Lines show medians and interquartile ranges. ns = not significant ( $p > 0.1$ ), two-way ANOVA with Sidak's post-test.

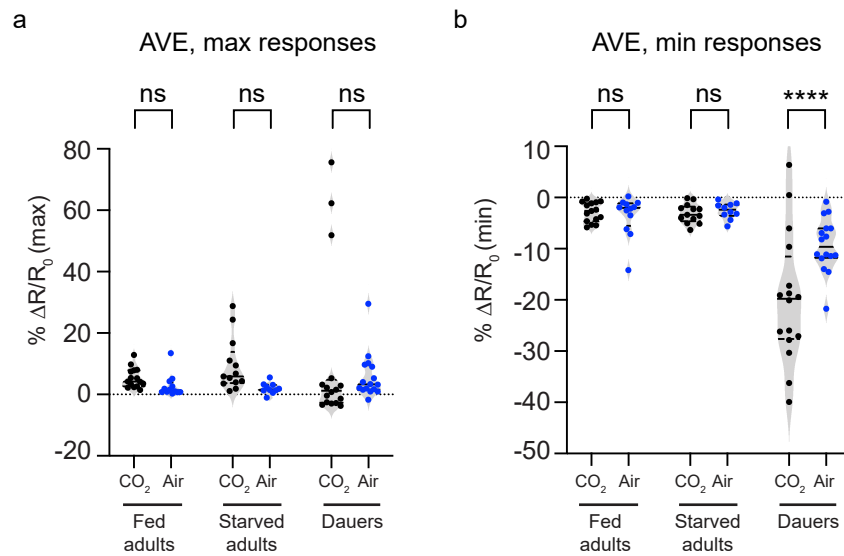

**Fig S8. Inhibitory responses in the AVE interneurons of dauers are evoked by CO<sub>2</sub>.** Quantification of the maximum (a) and minimum (b) calcium responses of AVE in well-fed adults, starved adults, and dauers to CO<sub>2</sub> (15% CO<sub>2</sub>, 21% O<sub>2</sub>, balance N<sub>2</sub>) vs. air (21% O<sub>2</sub>, balance N<sub>2</sub>). Only dauers show CO<sub>2</sub>-evoked inhibitory activity in AVE. In a-b, each data point represents the response of a single animal. Solid lines in violin plots show medians and dotted lines show interquartile ranges. \*\*\*\**p*<0.0001, ns = not significant (*p*>0.4), two-way ANOVA with Sidak's post-test. n = 11-16 animals per life stage and condition.

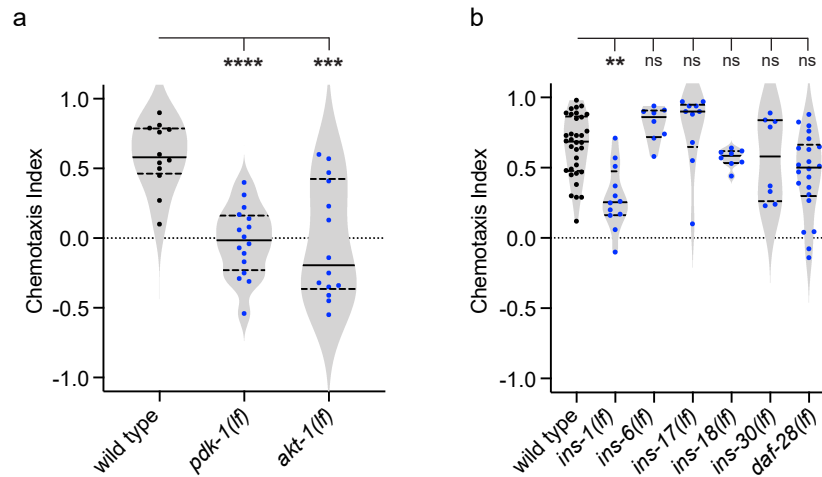

**Fig S9. Insulin signaling promotes CO<sub>2</sub> attraction in dauers.** **a.** Behavioral responses of *pdk-1(sa709)* and *akt-1(mg306)* mutant dauers in CO<sub>2</sub> chemotaxis assays. \*\*\*\* $p < 0.0001$ , \*\*\* $p < 0.001$ , one-way ANOVA with Dunnett's post-test.  $n = 12-16$  animals per genotype. **b.** The neuropeptide INS-1 promotes CO<sub>2</sub> attraction in dauers. Behavioral responses of dauers carrying loss-of-function mutations in candidate insulin-like peptide genes in CO<sub>2</sub> chemotaxis assays. \*\* $p < 0.01$ , ns = not significant ( $p > 0.2$ ), Kruskal-Wallis test with Dunn's post-test.  $n = 8-34$  animals per genotype. The specific loss-of-function (*lf*) alleles used for individual insulin-like peptide genes are indicated in the Materials and Methods. For a-b, each data point represents a single chemotaxis assay. Solid lines in violin plots show medians and dotted lines show interquartile ranges. Responses are to 10% CO<sub>2</sub>.

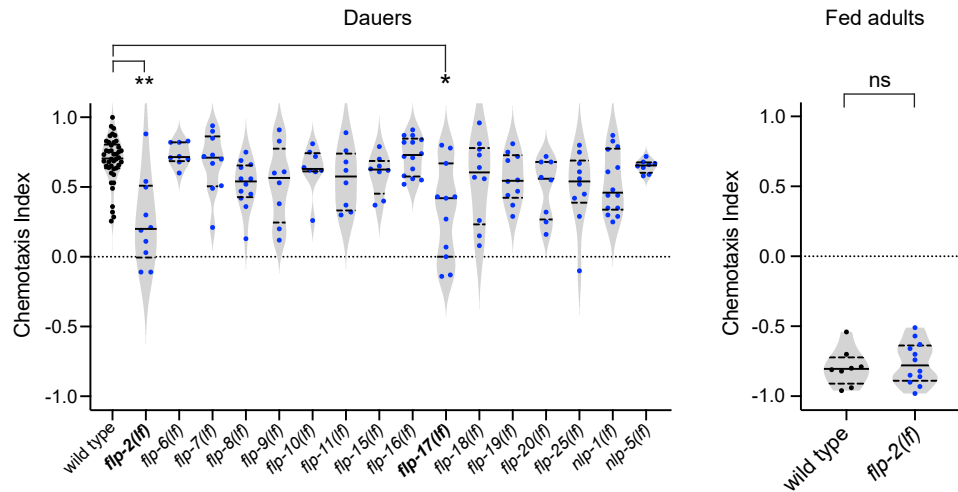

**Fig S10. A reverse genetic screen for neuropeptides that regulate CO<sub>2</sub> attraction in dauers.**

**a.** FLP-2 and FLP-17 neuropeptides regulate CO<sub>2</sub> attraction in dauers. The graph shows the behavioral responses of dauers with loss-of-function mutations in candidate neuropeptide genes in CO<sub>2</sub> chemotaxis assays. \*\* $p < 0.01$ , \* $p < 0.05$ , Kruskal-Wallis test with Dunn's post-test.  $n = 8-42$  assays per genotype. The specific loss-of-function (*lf*) alleles used for individual neuropeptide genes are indicated in the Methods. **b.** FLP-2 neuropeptides do not regulate CO<sub>2</sub> repulsion in well-fed adults. Behavioral responses of *flp-2(gk1039)* mutant well-fed adults in a CO<sub>2</sub> chemotaxis assay. ns = not significant ( $p = 0.6176$ ), Welch's *t*-test.  $n = 8-12$  assays per genotype. For a-b, each data point represents a single chemotaxis assay. Solid lines in violin plots show medians and dotted lines show interquartile ranges. Responses are to 10% CO<sub>2</sub>.

**Table S1.** The list of strains used. *lf* = loss-of-function mutation; *ts* = temperature-sensitive.

| Strain  | Genotype                                                                                                                      | Strain description                                             | Source and References                     |
|---------|-------------------------------------------------------------------------------------------------------------------------------|----------------------------------------------------------------|-------------------------------------------|
| N2      | Wild-type Bristol                                                                                                             | wild type                                                      | CGC                                       |
| AX2073  | <i>lin-15(n765ts); dbEx[flp-17::YC3.60, lin-15(+)]</i>                                                                        | Cameleon in BAG                                                | de Bono lab <sup>1,2</sup>                |
| EAH284  | <i>bruEx138[ttx-3::casp-3(p17); ttx-3::casp-3(p12); myo-2::dsRed]</i>                                                         | AIY ablation                                                   | Hallem lab <sup>1,3</sup>                 |
| EAH268  | <i>bruEx160[twk-3::casp-3(p17); twk-3::casp-3(p12); myo-2::dsRed]</i>                                                         | RIG ablation                                                   | Hallem lab <sup>1,3</sup>                 |
| EAH 202 | <i>pels578[npr-9::casp1, npr-9::Venus, unc-122::mCherry]</i>                                                                  | AIB ablation                                                   | lino lab <sup>4</sup>                     |
| EAH319  | <i>bruEx171[glr-3::casp-3(p17); glr-3::casp-3(p12); myo-2::dsRed]</i>                                                         | RIA ablation                                                   | Hallem lab <sup>1,3</sup>                 |
| OS4977  | <i>nsEx2847[pept-3::TeTx, elt-2::mCherry]</i>                                                                                 | Tetanus toxin in AVE                                           | Shaham lab <sup>5</sup>                   |
| EAH287  | <i>bruEx163[twk-3::pkc-1(gf)::SL2::GFP]</i>                                                                                   | <i>pkc-1(gf)</i> in RIG                                        | Hallem lab <sup>1</sup>                   |
| PS6028  | <i>syEx1134[twk-3::YC3.60; pax-2::GFP]</i>                                                                                    | Cameleon in RIG                                                | Sternberg lab <sup>1</sup>                |
| EAH148  | <i>kyIs536[flp-17::p17::SL2::GFP, elt-2::mCherry]; kyIs538[glb-5::p12::SL2::GFP, elt-2::mCherry]; syEx1134[twk-3::YC3.60]</i> | Cameleon in RIG in BAG-ablated background                      | Hallem lab <sup>1</sup>                   |
| IK1405  | <i>njEx568[ttx-3::YC3.60, ges-1::NLS-RFP]</i>                                                                                 | Cameleon in AIY                                                | Mori lab <sup>1</sup>                     |
| EAH259  | <i>Ex[odr-2(1b)::YC3.60; lin-44::GFP]</i>                                                                                     | Cameleon in AIB                                                | Hirotsu lab <sup>6</sup>                  |
| CX15457 | <i>kyIs620[inx-1::HisCl1::SL2::GFP, myo-3::mCherry]</i>                                                                       | HisCl1 in AIB                                                  | Bargmann lab <sup>7</sup>                 |
| EAH381  | <i>che-7(ok2373); Ex[odr-2(1b)::YC3.60; lin44::GFP]</i>                                                                       | Cameleon in AIB in <i>che-7(lf)</i> background                 | Hallem lab (this paper)                   |
| RB1834  | <i>che-7(ok2373)</i>                                                                                                          | <i>che-7(lf)</i> mutant                                        | CGC <sup>8</sup>                          |
| OH14014 | <i>inx-6(ot804[inx-6::SL2::NLS::YFP::H2B]; ot840[inx-6Del &gt; TAAATTA::SL2::NLS::YFP::H2B])</i>                              | Dauer-specific expression of <i>inx-6</i> in AIB is eliminated | Hobert lab <sup>9</sup>                   |
| OH14529 | <i>otTi19(Si[Pnpr-9::INX-6::GFP])</i>                                                                                         | <i>inx-6</i> expression in AIB in adults                       | Hobert lab <sup>9</sup>                   |
| PS5932  | <i>lin-15(n765); syEx1111[opt-3::YC3.60, lin-15(+)]</i>                                                                       | Cameleon in AVE                                                | Sternberg lab                             |
| CB1370  | <i>daf-2(e1370)</i>                                                                                                           | <i>daf-2(lf)</i> mutant ( <i>ts</i> allele)                    | CGC <sup>10</sup>                         |
| JT709   | <i>pdk-1(sa709)</i>                                                                                                           | <i>pdk-1(lf)</i> mutant                                        | CGC <sup>11</sup>                         |
| BQ1     | <i>akt-1(mg306)</i>                                                                                                           | <i>akt-1(lf)</i> mutant                                        | CGC <sup>12</sup>                         |
| NS3242  | <i>ins-1(nr2091)</i>                                                                                                          | <i>ins-1(lf)</i> mutant                                        | Ruvkun lab <sup>13</sup>                  |
| RB1809  | <i>ins-30(ok2343)</i>                                                                                                         | <i>ins-30(lf)</i> mutant                                       | CGC <sup>8</sup>                          |
| RB2059  | <i>ins-28(ok2722)</i>                                                                                                         | <i>ins-28(lf)</i> mutant                                       | CGC <sup>8</sup>                          |
| VC1218  | <i>ins-18(ok1672)</i>                                                                                                         | <i>ins-18(lf)</i> mutant                                       | CGC <sup>8</sup>                          |
| FX2416  | <i>ins-6(tm2416)</i>                                                                                                          | <i>ins-6(lf)</i> mutant                                        | National BioResource Project (Mitani lab) |
| FX790   | <i>ins-17(tm790)</i>                                                                                                          | <i>ins-17(lf)</i> mutant                                       | National BioResource Project (Mitani lab) |
| JT191   | <i>daf-28(sa191)</i>                                                                                                          | <i>daf-28(lf)</i> mutant ( <i>ts</i> allele)                   | CGC <sup>14</sup>                         |



|         |                                                          |                                                              |                                                          |
|---------|----------------------------------------------------------|--------------------------------------------------------------|----------------------------------------------------------|
| EAH382  | <i>daf-2(e1370); syEx1134[fwk-3::YC3.60, pax-2::GFP]</i> | Cameleon in RIG in <i>daf-2(lf)</i> background               | Hallem lab (this paper)                                  |
| EAH383  | <i>daf-2(e1370); Ex[odr-2(1b)::YC3.60; lin-44::GFP]</i>  | Yellow cameleon YC3.60 in AIB in <i>daf-2(lf)</i> background | Hallem lab (this paper)                                  |
| MT6308  | <i>eat-4(ky5)</i>                                        | <i>eat-4(lf)</i> mutant                                      | CGC <sup>1</sup>                                         |
| MT10661 | <i>tdc-1(n3420)</i>                                      | <i>tdc-1(lf)</i> mutant                                      | CGC <sup>3</sup>                                         |
| RB1341  | <i>nlp-1(ok1470)</i>                                     | <i>nlp-1(lf)</i> mutant                                      | CGC <sup>1,3,8</sup>                                     |
| RB1609  | <i>nlp-5(ok1981)</i>                                     | <i>nlp-5(lf)</i> mutant                                      | CGC <sup>8</sup>                                         |
| FX5158  | <i>flp-16(tm5158)</i>                                    | <i>flp-16(lf)</i> mutant                                     | National BioResource Project (Mitani lab) <sup>1,3</sup> |
| VC2497  | <i>flp-3(ok3265)</i>                                     | <i>flp-3(lf)</i> mutant                                      | CGC <sup>8</sup>                                         |
| RB1990  | <i>flp-7(ok2625)</i>                                     | <i>flp-7(lf)</i> mutant                                      | CGC <sup>8</sup>                                         |
| RB1902  | <i>flp-19(ok2460)</i>                                    | <i>flp-19(lf)</i> mutant                                     | CGC <sup>8,15</sup>                                      |
| PT502   | <i>flp-10(pk367)</i>                                     | <i>flp-10(lf)</i> mutant                                     | Barr lab <sup>15</sup>                                   |
| RB2067  | <i>flp-9(ok2730)</i>                                     | <i>flp-9(lf)</i> mutant                                      | CGC <sup>8</sup>                                         |
| VC2016  | <i>flp-18(gk3063)</i>                                    | <i>flp-18(lf)</i> mutant                                     | CGC <sup>8</sup>                                         |
| FX2706  | <i>flp-11(tm2706)</i>                                    | <i>flp-11(lf)</i> mutant                                     | National BioResource Project (Mitani lab)                |
| RB2575  | <i>flp-17(ok3587)</i>                                    | <i>flp-17(lf)</i> mutant                                     | CGC <sup>8</sup>                                         |
| MT15933 | <i>flp-17(n4894)</i>                                     | <i>flp-17(lf)</i> mutant                                     | CGC <sup>1,16</sup>                                      |
| VC2591  | <i>flp-2(ok3351)</i>                                     | <i>flp-2(lf)</i> mutant                                      | CGC <sup>8</sup>                                         |
| VC2490  | W07E11.1 & <i>flp-2(gk1039)</i>                          | <i>flp-2(lf)</i> mutant                                      | CGC <sup>8</sup>                                         |
| RB2188  | <i>flp-20(ok2964)</i>                                    | <i>flp-20(lf)</i> mutant                                     | CGC <sup>8</sup>                                         |
| VC2324  | <i>flp-6(ok3056)</i>                                     | <i>flp-6(lf)</i> mutant                                      | CGC <sup>8</sup>                                         |
| VC2504  | <i>flp-15(gk1186)</i>                                    | <i>flp-15(lf)</i> mutant                                     | CGC <sup>8</sup>                                         |

## References:

- Guillermin, M. L., Carrillo, M. A. & Hallem, E. A. A single set of interneurons drives opposite behaviors in *C. elegans*. *Curr Biol* **27**, 2630-2639 (2017).
- Sinnige, T. *et al.* Expression of the amyloid-beta peptide in a single pair of *C. elegans* sensory neurons modulates the associated behavioural response. *PLoS ONE* **14**, e0217746, doi:10.1371/journal.pone.0217746 (2019).
- Rengarajan, S., Yankura, K. A., Guillermin, M. L., Fung, W. & Hallem, E. A. Feeding state sculpts a circuit for sensory valence in *Caenorhabditis elegans*. *Proc Natl Acad Sci USA* **116**, 1776-1781, doi:10.1073/pnas.1807454116 (2019).
- Kunitomo, H. *et al.* Concentration memory-dependent synaptic plasticity of a taste circuit regulates salt concentration chemotaxis in *Caenorhabditis elegans*. *Nat Commun* **4**, 2210, doi:10.1038/ncomms3210 (2013).
- Katz, M., Corson, F., Iwanir, S., Biron, D. & Shaham, S. Glia modulate a neuronal circuit for locomotion suppression during sleep in *C. elegans*. *Cell Rep* **22**, 2575-2583, doi:10.1016/j.celrep.2018.02.036 (2018).
- Uozumi, T. *et al.* Temporally-regulated quick activation and inactivation of Ras is important for olfactory behaviour. *Sci Rep* **2**, 500, doi:10.1038/srep00500 (2012).
- Pokala, N., Liu, Q., Gordus, A. & Bargmann, C. I. Inducible and titratable silencing of *Caenorhabditis elegans* neurons *in vivo* with histamine-gated chloride channels. *Proc Natl Acad Sci USA* **111**, 2770-2775, doi:10.1073/pnas.1400615111 (2014).
- The *C. elegans* Deletion Mutant Consortium. Large-scale screening for targeted knockouts in the *Caenorhabditis elegans* genome. *G3* **2**, 1415-1425, doi:10.1534/g3.112.003830 (2012).
- Bhattacharya, A., Aghayeva, U., Berghoff, E. G. & Hobert, O. Plasticity of the electrical connectome of *C. elegans*. *Cell* **176**, 1174-1189, doi:10.1016/j.cell.2018.12.024 (2019).

- 10 Riddle, D. L. A genetic pathway for dauer larva formation in *C. elegans*. *Stadler Genetics Symposium* **9**, 101-120 (1977).
- 11 Paradis, S., Ailion, M., Toker, A., Thomas, J. H. & Ruvkun, G. A PDK1 homolog is necessary and sufficient to transduce AGE-1 PI3 kinase signals that regulate diapause in *Caenorhabditis elegans*. *Genes Dev* **13**, 1438-1452, doi:10.1101/gad.13.11.1438 (1999).
- 12 Shmookler Reis, R. J., Ayyadevara, S., Crow, W. A., Lee, T. & DeLongchamp, R. R. Gene categories differentially expressed in *C. elegans age-1* mutants of extraordinary longevity: new insights from novel data-mining procedures. *J Gerontol A Biol Sci Med Sci* **67**, 366-375, doi:10.1093/gerona/glr186 (2012).
- 13 Pierce, S. B. *et al.* Regulation of DAF-2 receptor signaling by human insulin and *ins-1*, a member of the unusually large and diverse *C. elegans* insulin gene family. *Genes Dev* **15**, 672-686, doi:10.1101/gad.867301 (2001).
- 14 Birnby, D. A. *et al.* A transmembrane guanylyl cyclase (DAF-11) and Hsp90 (DAF-21) regulate a common set of chemosensory behaviors in *Caenorhabditis elegans*. *Genetics* **155**, 85-104 (2000).
- 15 Carrillo, M. A., Guillermin, M. L., Rengarajan, S., Okubo, R. & Hallem, E. A. O<sub>2</sub>-sensing neurons control CO<sub>2</sub> response in *C. elegans*. *J Neurosci* **33**, 9675-9683, doi:10.1523/JNEUROSCI.4541-12.2013 (2013).
- 16 Horowitz, L. B., Brandt, J. P. & Ringstad, N. Repression of an activity-dependent autocrine insulin signal is required for sensory neuron development in *C. elegans*. *Development* **146**, doi: 10.1242/dev.182873 (2019).
